# Structural basis of integrin $\alpha6\beta4$ interaction with the bullous pemphigoid antigen BP230 in hemidesmosomes

José A Manso<sup>1</sup>, María Gómez-Hernández<sup>1</sup>, Arturo Carabias<sup>1</sup>, Noelia Alonso-García<sup>1</sup>, Inés García-Rubio<sup>2</sup>, Maaïke Kreft<sup>3</sup>, Arnoud Sonnenberg<sup>3</sup>, and José M de Pereda<sup>1</sup>

<sup>1</sup>Instituto de Biología Molecular y Celular del Cáncer, Consejo Superior de Investigaciones Científicas - University of Salamanca, Campus Unamuno, 37007 Salamanca, Spain.

<sup>2</sup>Centro Universitario de la Defensa, ctra. Huesca s/n, 50090 Zaragoza, Spain.

<sup>3</sup>Netherlands Cancer Institute, Plesmanlaan 121, 1066 CX Amsterdam, The Netherlands.

Running title: BP230 recognition by integrin  $\alpha6\beta4$

## Abstract

**Mechanical stability of epithelia requires firm attachment of the cells to the basement membrane via complexes named hemidesmosomes. Disorders that target hemidesmosomal proteins cause severe skin blistering diseases. In type I hemidesmosomes, present in the epidermis, integrin  $\alpha6\beta4$  is connected to intermediate filaments via plectin and BP230 (BPAG1e). To unravel the molecular basis of the BP230- $\beta4$  interaction, we first mapped their mutual binding sites and subsequently solved the crystal structure of a human BP230- $\beta4$  complex. BP230 binds to the fourth FnIII domain and in between the third and fourth FnIII domains of  $\beta4$ , which in turn form an inter-domain ionic clasp required for binding. Using DEER, we show that BP230-binding induces closure of the two FnIII domains. Disruption of the BP230- $\beta4$  interface prevents the recruitment of BP230 to hemidesmosomes in keratinocytes in culture, revealing a key role of the BP230- $\beta4$  interaction for the assembly of hemidesmosomes. Phosphomimetic substitutions of T1663 of  $\beta4$ , and T39 and S46 of BP230, disrupt binding, suggesting that the BP230- $\beta4$  interaction might be regulated by phosphorylation during hemidesmosome disassembly.**

**Keywords:** Cell adhesion | epithelia | hybrid methods | plakins | protein-protein interactions

**Correspondence:** [pereda@usal.es](mailto:pereda@usal.es)

## Introduction

Hemidesmosomes (HDs) are junctional complexes that mediate the firm attachment of epithelial cells to the basement membrane to maintain the integrity of epithelial tissues (Walko et al, 2015). Pseudostratified and stratified epithelia, such as the epidermis, assemble classic type I

HDs. These are rivet-like structures that contain three transmembrane proteins, the integrin  $\alpha6\beta4$ , the bullous pemphigoid antigen BP180 (also known as BPAG2 or collagen XVII), and the tetraspanin CD151; and two intracellular proteins of the plakin family, plectin and BP230 (also known as BPAG1e).  $\alpha6\beta4$  and BP180 bind to laminin-332 in the epidermal basement membrane (Van den Bergh et al, 2011; Wilhelmsen et al, 2006), and are connected to the keratin intermediate filaments via plectin and BP230 (Geerts et al, 1999; Niessen et al, 1997a; Rezniczek et al, 1998), thereby linking the extracellular matrix to the cytoskeleton. Simple epithelia, such as that in the intestine, assemble type II HDs that contain  $\alpha6\beta4$  and plectin but lack BP180 and BP230.

The integrin  $\alpha6\beta4$  is an essential component of HDs and a hub of the HD protein-interaction network. Most of the intracellular interactions of  $\alpha6\beta4$  are established by the  $\beta4$  subunit. The  $\beta4$  cytodomain (~1000 residues) is unique in the integrin family, it contains a Calx $\beta$  and four fibronectin type-III domains arranged in two pairs (FnIII-1,2 and FnIII-3,4) separated by a region named the connecting segment (CS); a C-terminal tail (C-tail) extends downstream of the FnIII-4 (Fig 1A). The FnIII-1,2 and the beginning of the CS bind to the actin-binding domain (ABD) of plectin (de Pereda et al, 2009; Geerts et al, 1999). The final part of the CS and the C-tail make a second site of contact with the plakin domain of plectin (Koster et al, 2004; Rezniczek et al, 1998). The FnIII-3,4 and part of the CS bind to BP230 (Hopkinson & Jones, 2000; Koster et al, 2003). The FnIII-3 also interacts with the cytoplasmic domain of BP180 (Koster et al, 2003). Recently, the region FnIII-3,4-C-tail has been shown to interact with Solo (ARHGEF40), a guanine nucleotide exchange factor of the RhoA small GTPase, which is required for the formation of HDs in mammary epithelial cells (Fujiwara et al, 2018).

BP230 is the epidermal-specific splice variant coded by the dystonin gene *DST* (Leung et al, 2001). BP230 has the

characteristic three-segment structure shared by classic plakins. The N-terminal region contains a short isoform-specific N-terminal tail (N-tail) followed by a plakin domain (~1000 residues) that consists of eight spectrin repeats (SR2 to SR9) and an SH3 domain (Jefferson et al, 2007; Sonnenberg et al, 2007) (Fig 1A). This region interacts with  $\alpha 6\beta 4$  and with BP180 (Koster et al, 2003). The central region is occupied by a coiled-coil rod domain that acts as a spacer (Tang et al, 1996). Finally, the C-terminal region, which contains two plakin repeat domains, binds to keratin intermediate filaments (Fontao et al, 2003).

Recruitment of BP230 into HDs requires the association of plectin with  $\alpha 6\beta 4$  and the presence of BP180 (Koster et al, 2003), suggesting that BP230 is incorporated in the final stages of HD assembly (Wilhelmsen et al, 2006). Genetic mutations in the *DST* gene that target BP230 cause a mild form of epidermolysis bullosa simplex, a blistering disease characterized by skin fragility (Groves et al, 2010). Ablation of BP230 in mice resulted in a similar phenotype of blistering caused by mechanical stress (Guo et al, 1995). In the absence of BP230, HDs lack an intracellular substructure called the inner plaque, and the bundles of keratin filaments do not attach to the HDs. The role of BP230 in the attachment of intermediate filaments is further supported by the absence of the inner plaque in type II HDs and the less robust connection of intermediate filaments to type II than to type I HDs (Uematsu et al, 1994).

HDs are dynamic complexes that disassemble when epithelial cells migrate, for example during wound healing (Gipson et al, 1993) and in invasive carcinoma cells (Herold-Mende et al, 2001). In keratinocytes, epidermal growth factor and phorbol myristate acetate promote HD disassembly by inducing phosphorylation of the  $\beta 4$  subunit through the activation of the Ras/ERK-1/2 and protein kinase C signaling pathway (Frijns et al, 2010; Margadant et al, 2008; Rabinovitz et al, 1999). Phosphorylation of  $\beta 4$  at several serine residues in the CS (Frijns et al, 2010; Rabinovitz et al, 2004; Wilhelmsen et al, 2007) and in the C-tail (Frijns et al, 2012) disrupts the interaction with plectin and it is a major mechanism for HD disassembly. Phosphorylation of  $\beta 4$  at S1424 correlates with a loss of colocalization with BP230 and BP180 (Germain et al, 2009); yet, little is known about the mechanisms that regulate the interaction of  $\alpha 6\beta 4$  with BP proteins during HD disassembly.

The structural understanding of protein-protein interactions in HDs is limited to the primary contact between  $\alpha 6\beta 4$  and plectin (de Pereda et al, 2009; Song et al, 2015). We had previously solved the structure of the FnIII-3,4 of  $\beta 4$ , which adopts a compact and cambered structure with an evolutionary conserved surface that could correspond to a functional site (Alonso-Garcia et al, 2015); yet, how the FnIII-3,4 engages with BP230 or other proteins remained unknown. Here, we present a detailed mapping of the mutual binding sites in  $\beta 4$  and BP230, the

3D structure of the  $\beta 4$ -BP230 complex, and the conformational changes that binding causes in  $\beta 4$ . Finally, we have identified potentially phosphorylatable residues in BP230 and  $\beta 4$  that play key roles in their interaction.

## Results

### **Mapping the $\beta 4$ -binding site in the N-terminal tail of BP230**

Residues 1-56 of BP230 interact with the FnIII-3,4 of  $\beta 4$  in yeast two-hybrid assays; and the longer segment 1-92 showed a more efficient association with  $\beta 4$  (Koster et al, 2003). The region 1-92 includes the N-tail (residues 1-55) and the first  $\alpha$ -helix of the SR2 (BP230 does not have the SR1). To investigate the binding to  $\beta 4$  *in vitro*, we created constructs of BP230 that include the complete SR2 (56-162) to maintain the integrity of the SR fold. The fragment 1-162 of BP230 had extremely low solubility that hampered its characterization. The longer construct of this region suitable for analysis was the 10-162. Initially, we used size exclusion chromatography (SEC) to analyze the interaction of a fragment of integrin  $\beta 4$  (1436-1666) that includes part of the CS and the FnIII-3,4 domains (hereafter called  $\beta 4$ -CS-FnIII-3,4) with the fragments of BP230 N-tail-SR2 (10-162) and SR2 (Fig 1B). The N-tail-SR2 associated with  $\beta 4$ -CS-FnIII-3,4, as detected by their co-elution at smaller volumes than those of the individual proteins. On the other hand, the SR2 domain did not associate with  $\beta 4$  in the SEC experiments (Fig 1C). In summary, BP230 binds directly to  $\beta 4$  and binding requires the N-tail.

In order to map the regions within the N-tail of BP230 responsible for binding to  $\beta 4$ , a series of progressive N-terminal deletion mutants were created and their affinity for  $\beta 4$  was determined using a fluorescence anisotropy-based assay (Fig 1D,F).  $\beta 4$ -CS-FnIII-3,4 bound to BP230 constructs 10-162, 19-162, and 28-162 with similar affinity, suggesting that the segment 10-27 does not contribute to the interaction. The fragments of BP230 32-162 and 37-162 had slightly lower affinity with respect to the longer constructs. A greater reduction (five fold) in affinity was observed for the BP230 fragment 41-162, while removal of five additional residues, as in the 46-162 construct, resulted in an almost complete inhibition of the binding to  $\beta 4$ . Similarly, the isolated SR2 domain, residues 56-162, did not bind to  $\beta 4$ . In summary, residues 41-45 of the N-tail of BP230 were essential for binding to  $\beta 4$ , and the region 28-40 also contributed to the interaction.

Despite the fact that SR2 of BP230 was not sufficient to sustain binding to  $\beta 4$ , we explored if it contributes to the interaction. First, we created a chimeric protein in which the SR2 of BP230, residues 59-162, was replaced by the SR2 of plectin, residues 420-530. It should be noted that residues 56-58 of BP230 are identical to plectin 417-419.  $\beta 4$ -CS-FnIII-3,4 bound to the BP230/plectin chimera with a similar apparent equilibrium dissociation constant ( $K_d$ ) as

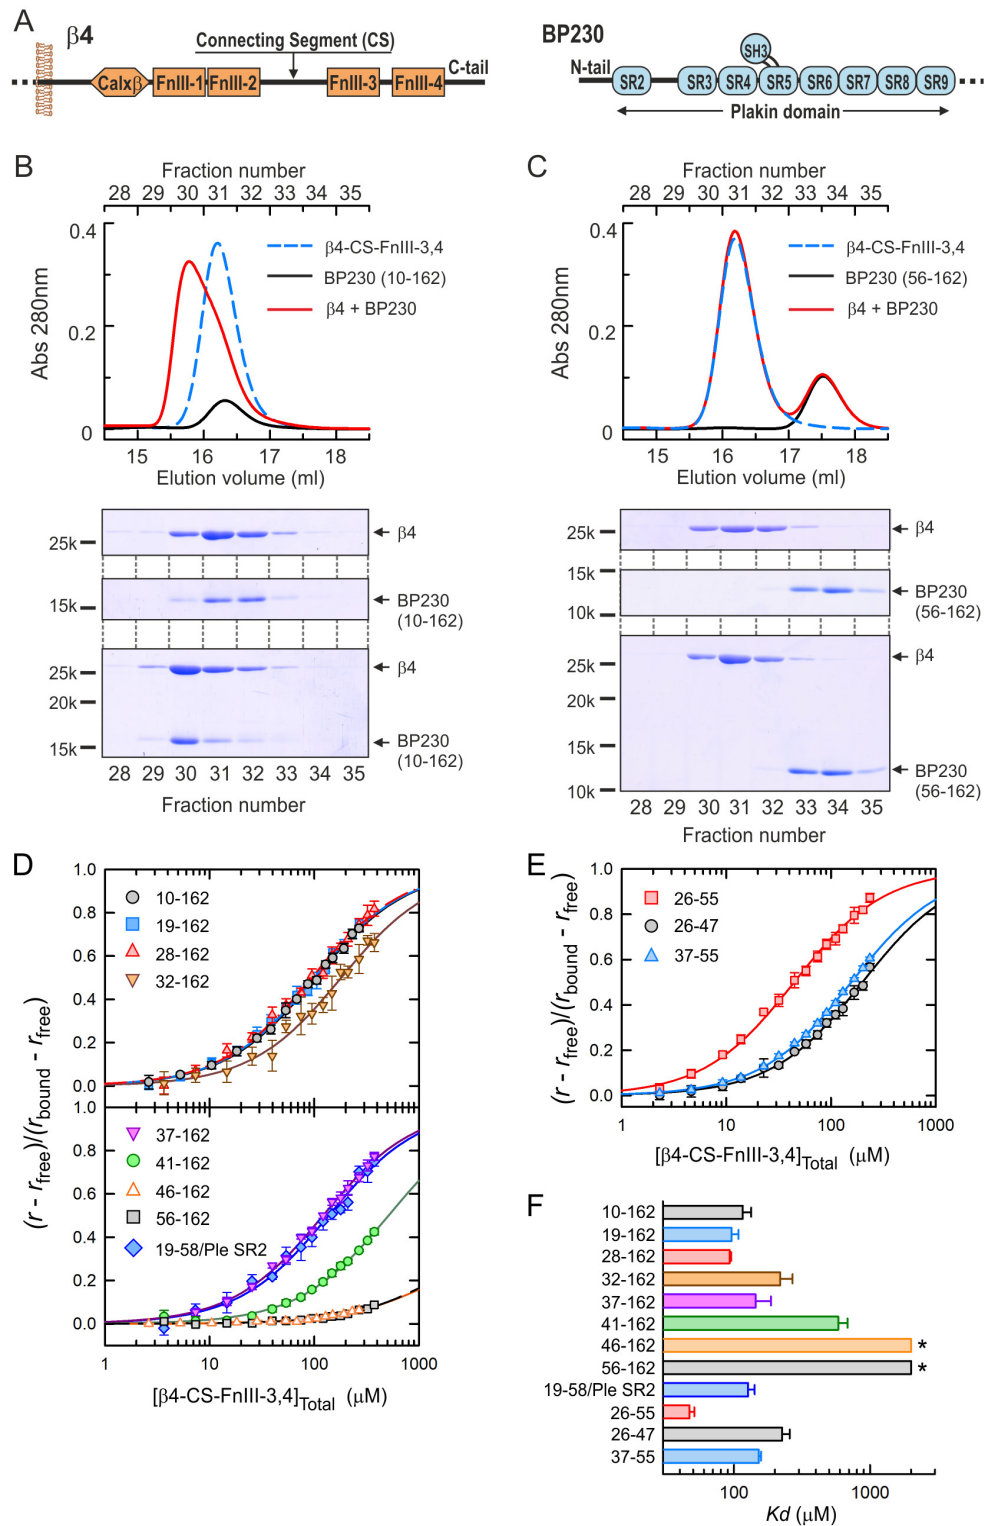

**Figure 1. Mapping the  $\beta 4$ -binding site in BP230.** (A) Domain organization of the cytoplasmic region of  $\beta 4$  and the N-terminal region of BP230. (B-C) Analysis by SEC of the interaction between  $\beta 4$ -CS-FnIII-3,4 and the BP230 fragments 10-162 (B) and 56-162 (C). Chromatograms of the isolated  $\beta 4$  and BP230, and equimolar mixtures are shown. SDS-PAGE analysis of the fractions is shown aligned in the bottom. (D) Equilibrium binding of  $\beta 4$ -CS-FnIII-3,4 to Oregon Green-labeled fragments of BP230, measured by fluorescence anisotropy ( $r$ ). Data are presented as fractional saturation. Lines are the fit of a one-to-one binding model. (E) Equilibrium binding of  $\beta 4$ -CS-FnIII-3,4 to fluorescein-labeled peptides of the N-tail of BP230; data and the fits are shown as in D. (F) Bar-chart of the  $K_d$  of the interaction between  $\beta 4$ -CS-FnIII-3,4 and the BP230 fragments. Error bars show the standard deviation (STD) from 2-4 experiments. Asterisks indicate minimal values compatible with the data.

to the equivalent BP230 fragment 19-162, suggesting that the SR2 is not required for binding to  $\beta 4$  or that its contribution can be mimicked by the SR2 of plectin.

Next, we analyzed the binding of  $\beta 4$  to three synthetic peptides of the N-tail, which lack the SR2 sequence (Fig 1E,F).  $\beta 4$  bound to the BP230 peptide 26-55 with even higher affinity than to the BP230 fragment 28-162 that contains the SR2; further supporting the notion that the SR2 is dispensable for the interaction. The differences in the affinity of  $\beta 4$  for the BP230 peptide 26-55 and the BP230 recombinant proteins might be related to the different labeling with fluorescent probes. The synthetic peptides carried an N-terminal fluorescein probe. On the other hand, recombinant proteins were labeled at thiol groups. BP230 contains two Cys in the N-tail, C36 and C44, within the  $\beta 4$ -binding site, whose labeling could interfere with the interaction. Binding of  $\beta 4$  to two shorter BP230 peptides, 26-47 and 37-55, shows a 5-fold and a 3-fold increase in the  $K_d$  with respect to the 26-55 peptide, respectively. Thus, the segments 26-36 and 48-55 contribute to the interaction. Taking together, our data indicate that the region 26-55 of the N-tail of BP230 is sufficient for binding to  $\beta 4$ .

### Mapping the BP230-binding site in $\beta 4$

First, we analyzed the contribution of the distinct modules in the minimal BP230-binding region of  $\beta 4$  previously identified using yeast two-hybrid assays (Koster et al, 2003) (Fig 2A). The fragment  $\beta 4$ -FnIII-3,4 (1457-1666) bound to BP230 with the same affinity as the longer  $\beta 4$ -CS-FnIII-3,4 (1436-1666), suggesting that the CS does not participate directly in the interaction. The individual FnIII domains did not bind to BP230, indicating that the FnIII-3,4 pair is necessary and sufficient for binding. In the yeast two-hybrid assays the CS of  $\beta 4$  might have been required for binding to BP230 to reduce steric hindrance between the Gal4 activation domain and the FnIII-3,4 of  $\beta 4$  in the fusion protein and to allow the correct transcriptional activation upon binding to BP230 fused to the Gal4 binding domain.

Next, we combined structure-based site directed mutagenesis with the fluorescent-based quantitative assay to map the BP230-binding site in  $\beta 4$  (Fig 2B,C). To prevent distortions of the FnIII fold, we introduced mutations at solvent-exposed residues that were identified using the 3D crystal structures of the FnIII-3 and FnIII-4 (Alonso-Garcia et al, 2015). In a first round of mutagenesis, we mainly created reverse-charge substitutions and, when possible, we changed two or three adjacent residues. The  $K_d$  of the interaction between the  $\beta 4$ -CS-FnIII-3,4 mutants and the BP230 26-55 region is shown in Fig 2B. The mutants Q1479R, E1480R, R1482E/E1484R/R1485E, E1493R, N1498R, E1501R, R1504E, Q1512R, E1541R/E1543R, and T1547R, which carry substitutions in the FnIII-3, showed values of the  $K_d$  within a 2-fold range, higher or

lower, with respect to the wild type (WT)  $\beta 4$  protein, and were considered to have a small effect on the interaction. On the other hand, the mutants R1463E, A1468R, A1468D, R1475E, Q1535R/E1536R, and R1540E/R1542E showed a notable reduction in the affinity for BP230. The effects of reverse-charge substitutions could be caused by either the loss of contacts mediated by the WT side-chain, or by contributions of the engineered residue. To differentiate these two mechanisms, when a mutation altered significantly the affinity for BP230, we also analyzed the change to Ala. R1463A, and R1475A also reduced the affinity for BP230, indicating that these two Arg play important roles for binding. To further characterize the double mutants that affect the binding, we also analyzed the individual substitutions. The single mutants Q1535R, Q1535A, E1536R, and E1536A showed a similar affinity for BP230 as the WT  $\beta 4$ , suggesting that individually these two residues have a minor contribution to the binding. As for the pair R1540E/R1542E, the single mutant R1540E displayed only a minor effect on the binding, while R1542E significantly reduced the affinity for BP230. Similarly, the R1542A, but not R1540A, reduced the affinity.

Similarly, we analyzed the effect of substitutions of residues in the FnIII-4. The  $\beta 4$  mutants V1578R/T1580R, R1595E/R1596E, D1600R, P1616R/T1618R, R1621E/D1623R, E1628R/R1630E, T1632R/P1634R, S1637R/E1638R, and F1654R had a similar affinity for BP230 as the WT protein. Only the substitution P1576R resulted in an increase in the  $K_d$  larger than 2-fold compared to the WT. The double mutant I1661R/T1663R had increased affinity for BP230 (~8-fold reduction in the  $K_d$ ). This effect was due to the change T1663R, since that single mutant showed a large reduction in the  $K_d$ , while the mutant I1661R had a similar affinity for BP230 as the WT  $\beta 4$ . In contrast to the effect of T1663R, the mutant T1663D showed reduced affinity for  $\beta 4$ , further supporting a role of T1663 in the interaction.

We mapped the residues modified in the mutagenesis analysis onto the 3D structure of the FnIII-3,4 (Fig 2D). The two FnIII domains are arranged in a slightly bent manner forming a curved shape with concave and convex sides, and the inter-domain linker protrudes on one side (Alonso-Garcia et al, 2015). The mutations were widely distributed throughout the surface of the FnIII-3,4. Yet, the residues whose substitutions mostly altered binding to BP230 (R1463, A1468, R1475, R1542, P1576, and T1663) clustered at the centre of the concave side, suggesting that the BP230-binding area extends around the cleft formed by the two FnIII domains.

Finally, to better understand the nature of the interaction we analyzed the effect of the ionic strength on the binding. The affinity of the interaction increased at high salt concentration (Fig 2E), which suggests that the binding of BP230 to  $\beta 4$  is mainly driven by hydrophobic interactions.

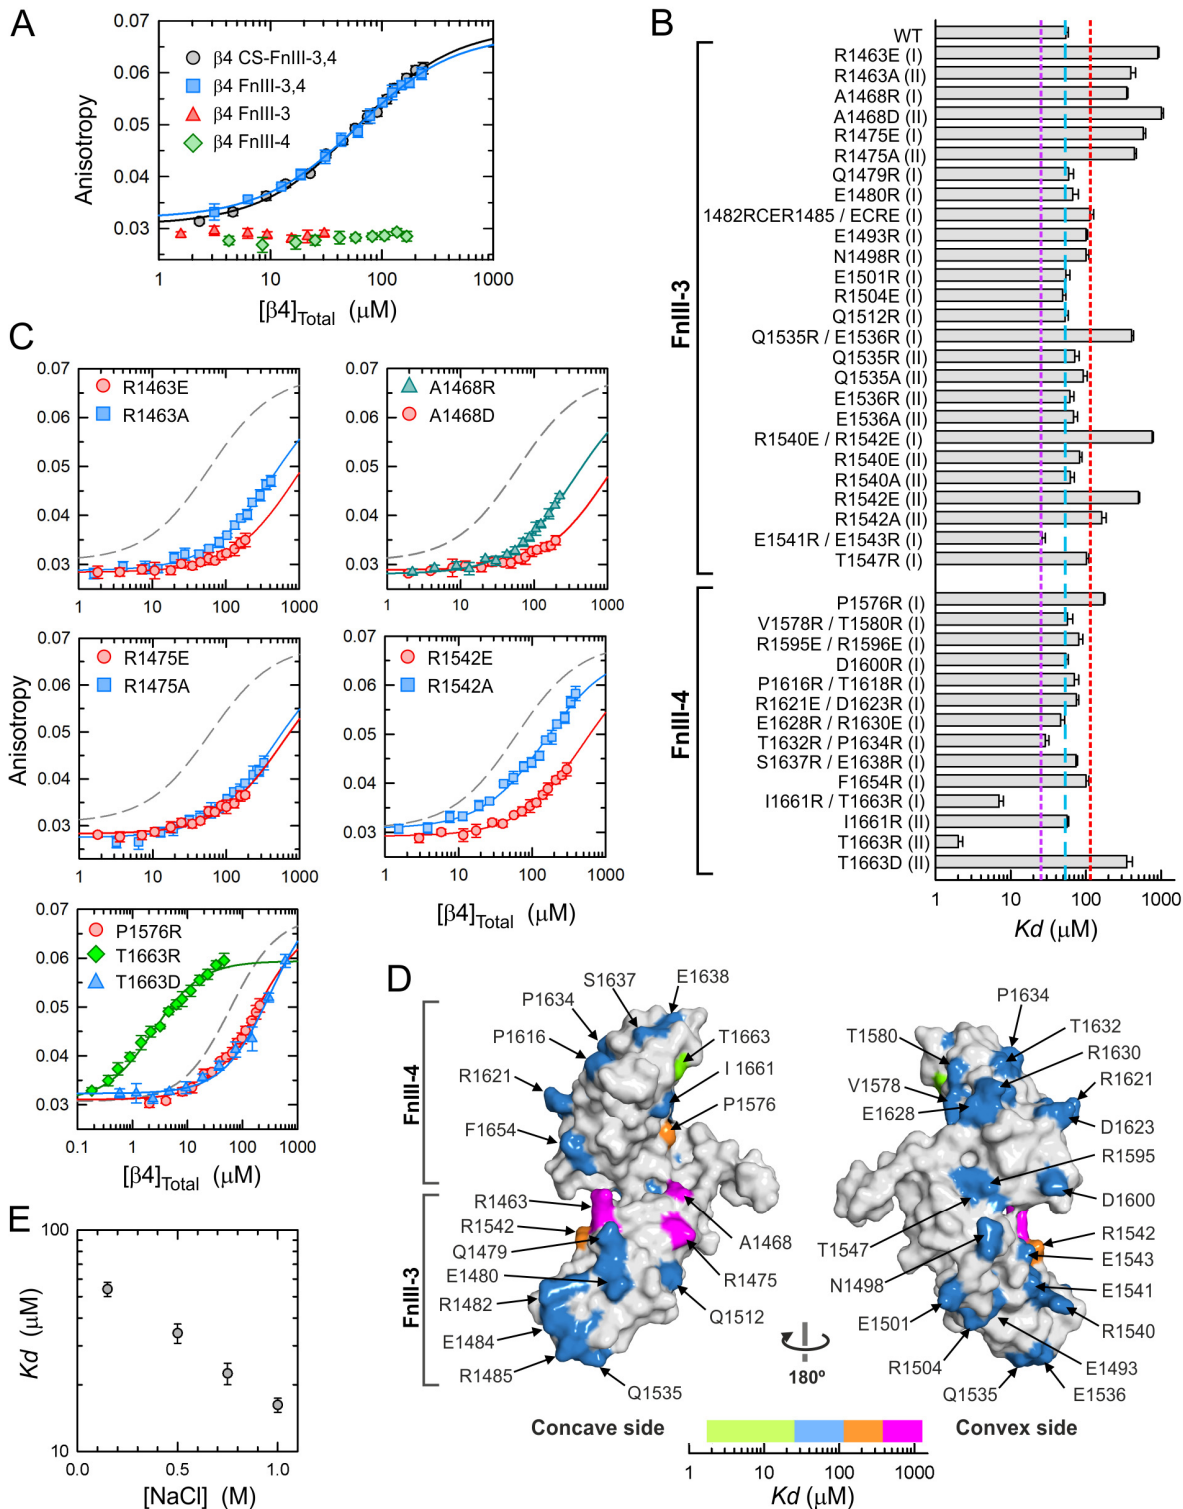

**Figure 2. Mapping the BP230-binding site in  $\beta 4$ .** (A) Equilibrium binding of fragments of  $\beta 4$  to the fluorescein-labeled BP230 peptide 26-55 ( $1\mu\text{M}$ ) measured by fluorescence anisotropy. Lines are the fit to the data. (B) Bar-chart of the  $K_d$  of the binding to BP230 26-55 of  $\beta 4$ -CS-Fn-3,4, WT and mutants. Error bars show the asymptotic standard error. Roman numerals in parenthesis indicate whether the mutant was created in a first (I) or second (II) round. Dashed vertical lines mark the  $K_d$  of WT  $\beta 4$  (cyan) and the two-fold lower and higher values with respect to the WT (purple and red). (C) Equilibrium binding of representative mutants. The binding curve of WT  $\beta 4$  (dashed lines) is shown for comparison. (D) Surface representation of the unbound structure of  $\beta 4$ -FnIII-3,4. Residues are colored according to the effect of their mutations on the affinity for BP230, as indicated by the color bar. For residues changed in double and single mutants, the effect of the latter is shown. (E) Effect of the salt concentration on the  $K_d$  of the BP230- $\beta 4$  interaction.

## Structure of the $\beta$ 4-BP230 complex

We used x-ray crystallography to unveil the structural basis of the BP230 binding to  $\beta$ 4. Initially, crystals of the  $\beta$ 4-BP230 complex were obtained using the high-affinity mutant T1663R of  $\beta$ 4-FnIII-3,4 bound to the BP230 peptide 26-55. The structure of the  $\beta$ 4(T1663R)-BP230 complex was refined against data to 1.55 Å. Subsequently, crystals of the WT  $\beta$ 4-BP230 complex were obtained in a similar manner and its structure was refined to 2.05 Å resolution. The WT and mutant complexes crystallized in the same crystal form that contains a single copy of the complex in the asymmetric unit (Table 1 and Fig 3A). The two structures were almost identical; after superimposition, the root mean square displacement (rmsd) of all main-chain atoms between the two structures was 1.03 Å. Only a segment of the inter-domain linker of  $\beta$ 4, residues 1557-1564, shows significant differences between the two structures (see below). Hereafter, the WT structure is described unless otherwise indicated.

The structures of the FnIII-3 and FnIII-4 in the complex are very similar to those observed in the crystals of the isolated domains with only minor differences near the BP230-binding site (Supplementary Fig S1). The inter-domain linker of  $\beta$ 4 contributes to the organization of the FnIII-3,4 region and to the BP230-binding interface. The final part of the linker, residues 1566-1569, forms a  $\beta$ -strand H that packs next to strand G2 of the FnIII-3; strand H lies between the two FnIII domains and participates in the BP230-binding site. Residues 1562-1564, upstream strand H, contact BP230 making two main-chain H-bonds. In the  $\beta$ 4(T1663R)-BP230 complex, the region 1557-1562 of the linker also contacts BP230, but it adopts a different conformation from that of WT complex (Supplementary Fig S2A,B). T1663R is unlikely to cause these differences in the linker because it does not induce changes in BP230. The structure of the mutant also revealed a partial disulfide bond between C1559 of  $\beta$ 4 and C36 of BP230. When  $\beta$ 4 carrying the C1559A substitution was expressed in PA-JEB keratinocytes, it recruited endogenous BP230 to a similar extent as when WT  $\beta$ 4 was expressed (Supplementary Fig S2C), suggesting that C1559 is not required for the interaction with BP230. Thus, a physiological role cannot be assigned to the disulfide bridge, which might have formed during the crystallization.

Continuous electron density was observed for residues 27-49 of BP230 in the WT structure (Fig 3B) and for residues 27-50 in the T1663R structure (Supplementary Fig S2D,E). BP230 adopts an extended hairpin-like structure that contains three  $\beta$ -strands ( $\beta$ A,  $\beta$ B, and  $\beta$ C). The first part of BP230 (residues 27-41) packs against one side of the FnIII-4; strands  $\beta$ A (29-33) and  $\beta$ B (39-40) make  $\beta$ -contacts with strands G2 and A of the FnIII-4, respectively (Fig 3C).  $\beta$ C (44-48) makes simultaneous backbone H-bonds with the strands A of the FnIII-3 and G2 of the FnIII-

4, creating a continuous  $\beta$ -sheet that extends along the two FnIII domains.

In addition to the main-chain interactions, the side chains of several residues of BP230 also contribute to the binding interface (Fig 3C-E). L32 and I41 of BP230 are buried in hydrophobic pockets on the surface of the FnIII-4. Similarly S43, I45, and F47 dock in pockets formed at the interface of the two FnIII domains. The hydroxyl group of S43 is H-bonded to R1658 at the centre of the cavity. V34 and L40 make hydrophobic contacts with shallower cavities on the surface of  $\beta$ 4. Most of these residues that bind in the pockets of  $\beta$ 4 are highly conserved in the BP230 sequences of multiple species (Fig 3F and supplementary Fig S3). L32 and I41, which have low conservation scores, are replaced by a Val in some species, suggesting that the hydrophobic contacts are conserved. In addition, the carboxamide groups of N30 and N42 are within H-bond distance with the carbonyls of I1661 and F1566, respectively. In summary, the structure suggests that binding of BP230 to  $\beta$ 4 is mainly driven by hydrophobic contacts, in agreement with the biochemical data (see above).

To gain further insight of the determinants of the BP230-recognition by  $\beta$ 4, we applied a structure-base computational method to predict the BP230 sequences tolerated at the interface (Fig 3G and supplementary Fig S4). Residues that dock into the  $\beta$ 4 pockets are predicted to have little tolerance. In addition, there is high preference for G37 and P38, which is in agreement with their very high conservation in multiple species. Yet, of these two residues, only P38 makes minor contacts with  $\beta$ 4. Glycines appear frequently before prolines, where they facilitate the cis-trans isomerization of the latter, suggesting that the G37-P38 tandem might play an important role in the local rearrangement of the BP230 during the binding to  $\beta$ 4.

The crystal structure is in good agreement with the mutagenesis data. R1463 in the FnIII-3 forms a salt bridge with E1659 in the FnIII-4 that closes over BP230 (Fig 3C). The inhibitory effect of the R1463E and R1463A mutations suggests that this inter-domain clasp is essential to stabilize the interaction. A1468 is buried facing the  $\beta$ 4 inter-domain linker; an Arg or Asp at this position may clash with the linker altering the binding site. R1475, located near the inter-domain cleft that accommodates the strand  $\beta$ C of BP230, does not engage directly with BP230, suggesting that the substitutions R1475E and R1475A affect indirectly the binding site. R1542 is near G48 of BP230; in addition, its side chain makes an H-bond with P1461 and contributes to the positioning of T1462, which in turn contacts BP230. Hence, the R1542E and R1542A substitutions are likely to alter this region of the interface. On the other hand, the nearby R1540 does not contact BP230, which explains the lack of effect on the binding of the R1540E and R1540A changes. P1576 in the FnIII-4 contacts L40 of BP230; the P1576R substitution is likely to reduce binding by distorting the interface (Fig 3D). Finally, T1663 is near E29

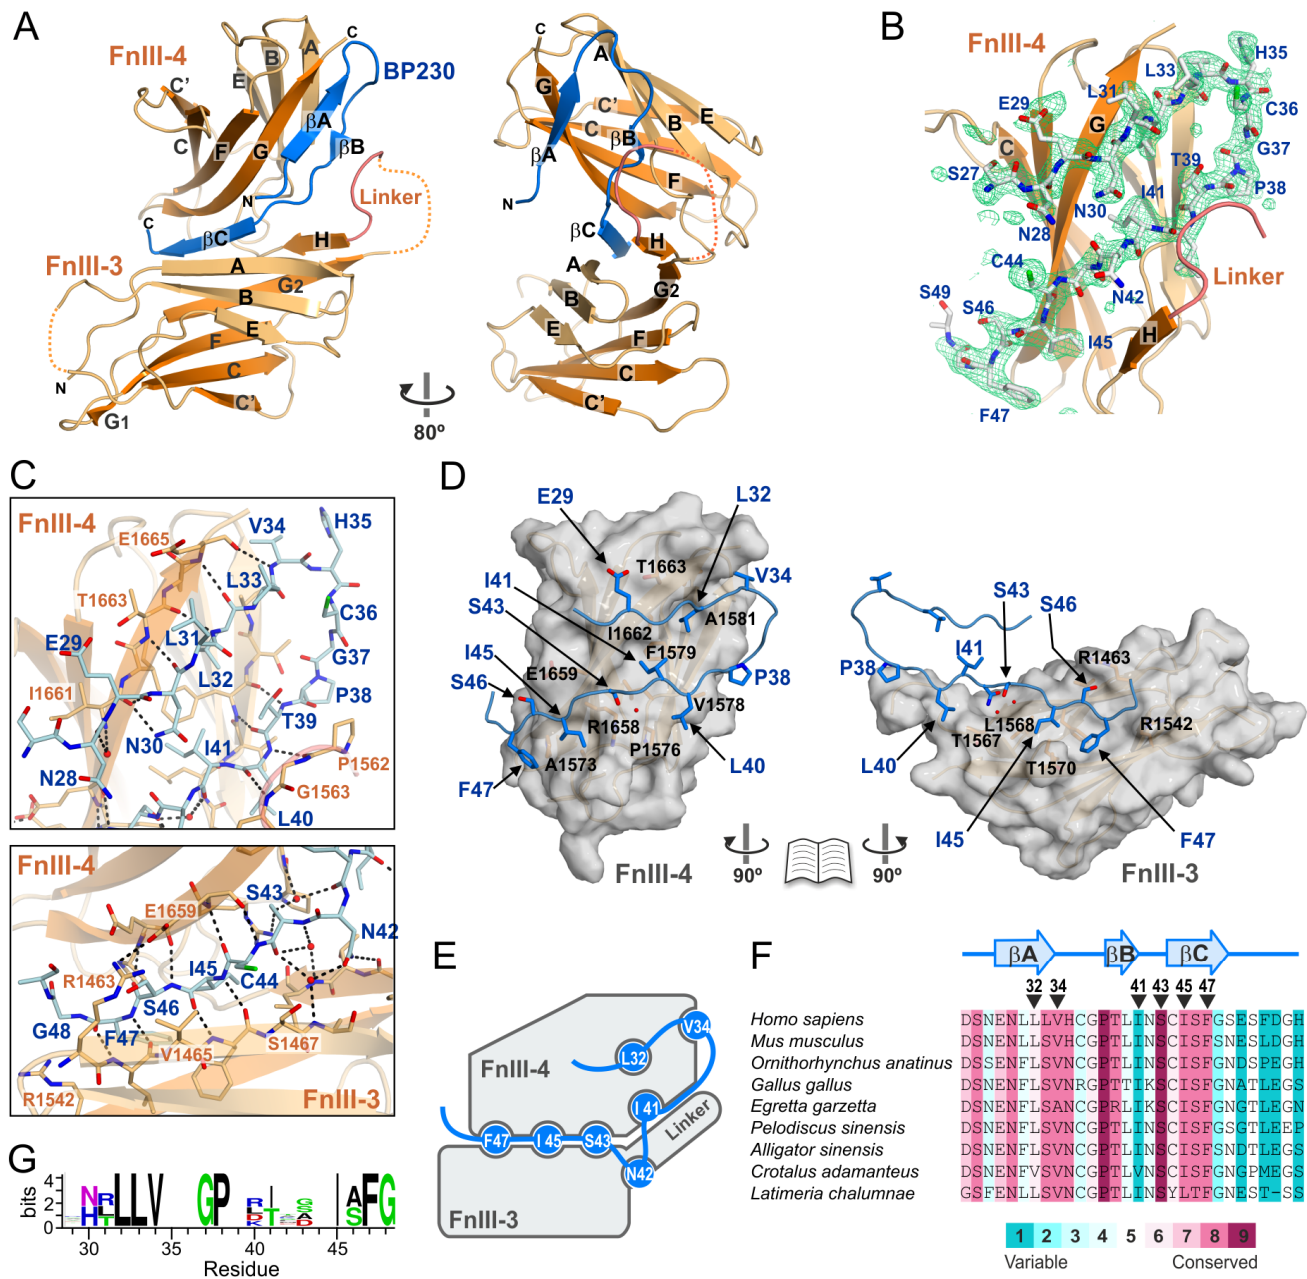

**Figure 3. Structure of BP230 bound to the FnIII-3,4 of  $\beta 4$ .** (A) Two views of a ribbon representation of the structure of the WT  $\beta 4$ -BP230 complex. (B) Composite omit simulated annealing difference map ( $mF_{obs}-DF_{calc}$ ) contoured at  $2.5 \sigma$  around BP230 (shown as sticks). For clarity, the FnIII-3 domain is not shown. (C) Contacts between BP230 (blue) and  $\beta 4$  (orange); waters are shown as red spheres. Polar contacts are shown as dashed lines. (D) Open-book view of the footprint of BP230 on the surface of the FnIII-4 (left) and the linker (right) of  $\beta 4$ . (E) Schematic illustration of the BP230 residues that dock into pockets of  $\beta 4$ . (F) Alignment of the region 26-55 of human BP230 with the sequences of representative species, colored by the evolutionary conservation. A multiple alignment of the sequences of 36 species used to calculate the conservation scores is shown in the supplementary Fig S3. (G) Sequence logo representation of the predicted consensus sequence that would tolerate binding to  $\beta 4$ .

of BP230. In the structure of the  $\beta 4$ (T1663R)-BP230 complex this engineered Arg makes an additional salt bridge with E29 without altering the conformation of E29 or the rest of BP230, which explains the increased affinity for BP230 of the T1663R mutant. On the other hand, the T1663D substitution is likely to reduce the affinity by creating an electrostatic repulsion with BP230.

### ***Distortion of the inter-domain arrangement of $\beta 4$ compromises the binding to BP230***

The mutations in  $\beta 4$  that affect binding to BP230 are near the inter-domain interface. This prompted us to analyze whether they might affect the structure of  $\beta 4$ . To this end, we analyzed the WT fragment  $\beta 4$ -CS-FnIII-3,4 and the single-point mutants that had a major impact on the binding to BP230 by using small angle x-ray scattering (SAXS) (Fig 4 and supplementary Table S1). The Guinier radius of gyration ( $R_g$ ) and the pair-distance distribution functions,  $P(r)$ , of the WT protein and the mutants R1463E, R1463A, R1475A, R1542E, R1542A, and T1663R were very similar. The mutant R1475E had a slightly larger  $R_g$  and its  $P(r)$  shows small differences with respect to the WT. In addition, this mutant has a higher average molecular mass revealed by larger Porod volume and intensity of the forward scattering ( $I(0)$ ) than the WT, suggesting that R1475E results in self association of  $\beta 4$ .

Mutants A1468R and A1468D had significant larger  $R_g$ , and their  $P(r)$  deviated significantly from that of the WT protein, suggesting that they have more extended shapes than WT  $\beta 4$ . To better understand the alterations caused by A1468R and A1468D, we analyzed the conformational heterogeneity using the Ensemble Optimization Method (EOM) (Fig 4C). The SAXS curves of the WT protein and most of the mutants analyzed were reproduced by ensembles of models with very similar and compact conformations. In contrast, the scattering curves of the mutants A1468R and A1468D were fitted by ensembles that combine models with a large dispersion of  $R_g$ , indicating that they are highly flexible. Since A1468 does contact BP230 directly (see above), the deleterious effect of A1468R and A1468D on the binding is likely to be mainly caused by the disruption of the inter-domain arrangement. In summary, these results support the view that BP230 recognizes a pre-ordered surface in  $\beta 4$ .

### ***Binding of BP230 induces a conformational change of $\beta 4$***

Superimposition of the structures of the FnIII-3,4 bound to BP230 and in the free form, by fitting the FnIII-3 domains, revealed differences in the relative orientation of the two FnIII domains (Fig 5A). The positions of the FnIII-4 in the two states are approximately related by a  $\sim 38^\circ$

rotation around an axis located along the interface between the two domains.

To further characterize the conformational change in  $\beta 4$  induced by BP230, we used Double Electron-Electron Resonance (DEER) spectroscopy, a method that was useful to measure long range inter-domain distances between engineered paramagnetic groups in the FnIII-3,4 (Alonso-Garcia et al, 2015). We used  $\beta 4$ -FnIII-3,4 mutants carrying the substitutions C1559A, C1483S, and T1663R; which only contain the wild type C1608 in the FnIII-4. A second Cys was introduced in the FnIII-3 alternatively at R1485C, R1504C, or L1497C (Fig 5B). Proteins were doubly labeled with the paramagnetic probe MTSL and the distances between the pairs of paramagnetic groups were measured by DEER in the absence and in the presence of BP230 26-55 (Fig 5C,D). The inter-spin distances in the free state matched those previously observed (Alonso-Garcia et al, 2015). In the presence of BP230 26-55, the peaks of the inter-spin distance distributions were displaced and were in good agreement with the distances between the probes modeled in structure of the  $\beta 4$ -BP230 complex. In summary, BP230 induces a movement of the FnIII domains that close onto BP230 in the concave side of  $\beta 4$ , with the inter-domain linker acting as a hinge.

### ***The $\beta 4$ -BP230 interaction is required for the recruitment of BP230 into HD***

To assess the role of the binding interface observed in the crystal structure on the recruitment of BP230 into HDs, we analyzed the distribution of BP230 and other hemidesmosomal proteins in PA-JEB keratinocytes (that do not express endogenous  $\beta 4$ ) in which WT or point mutants of  $\beta 4$  were expressed (Fig 6). Endogenous BP230 colocalized with WT  $\beta 4$  and with endogenous BP180 and plectin, displaying a punctuated pattern characteristic of HDs. In contrast, BP230 had a diffused localization in PA-JEB keratinocytes expressing  $\beta 4$  R1463E or R1463A, and BP230 did not co-localize either with BP180 or with plectin.  $\beta 4$ , BP180, and plectin showed a patched distribution in PA-JEB/ $\beta 4$ -R1463E or R1463A cells, which supports the view that BP230 is not required for the incorporation of these proteins into HDs (Koster et al, 2003; Wilhelmsen et al, 2006). When the high-affinity  $\beta 4$  mutant T1663R was expressed, BP230 was again recruited into HDs and colocalized with  $\beta 4$ , BP180, and plectin. In summary, the interaction between the N-tail of BP230 and the FnIII-3,4 is a major determinant for the incorporation of BP230 into HDs in keratinocytes.

### ***Role of potentially phosphorylatable residues in the interaction***

Phosphorylation of  $\beta 4$  by Ser/Thr kinases promotes HD disassembly by inhibiting the interaction of the integrin



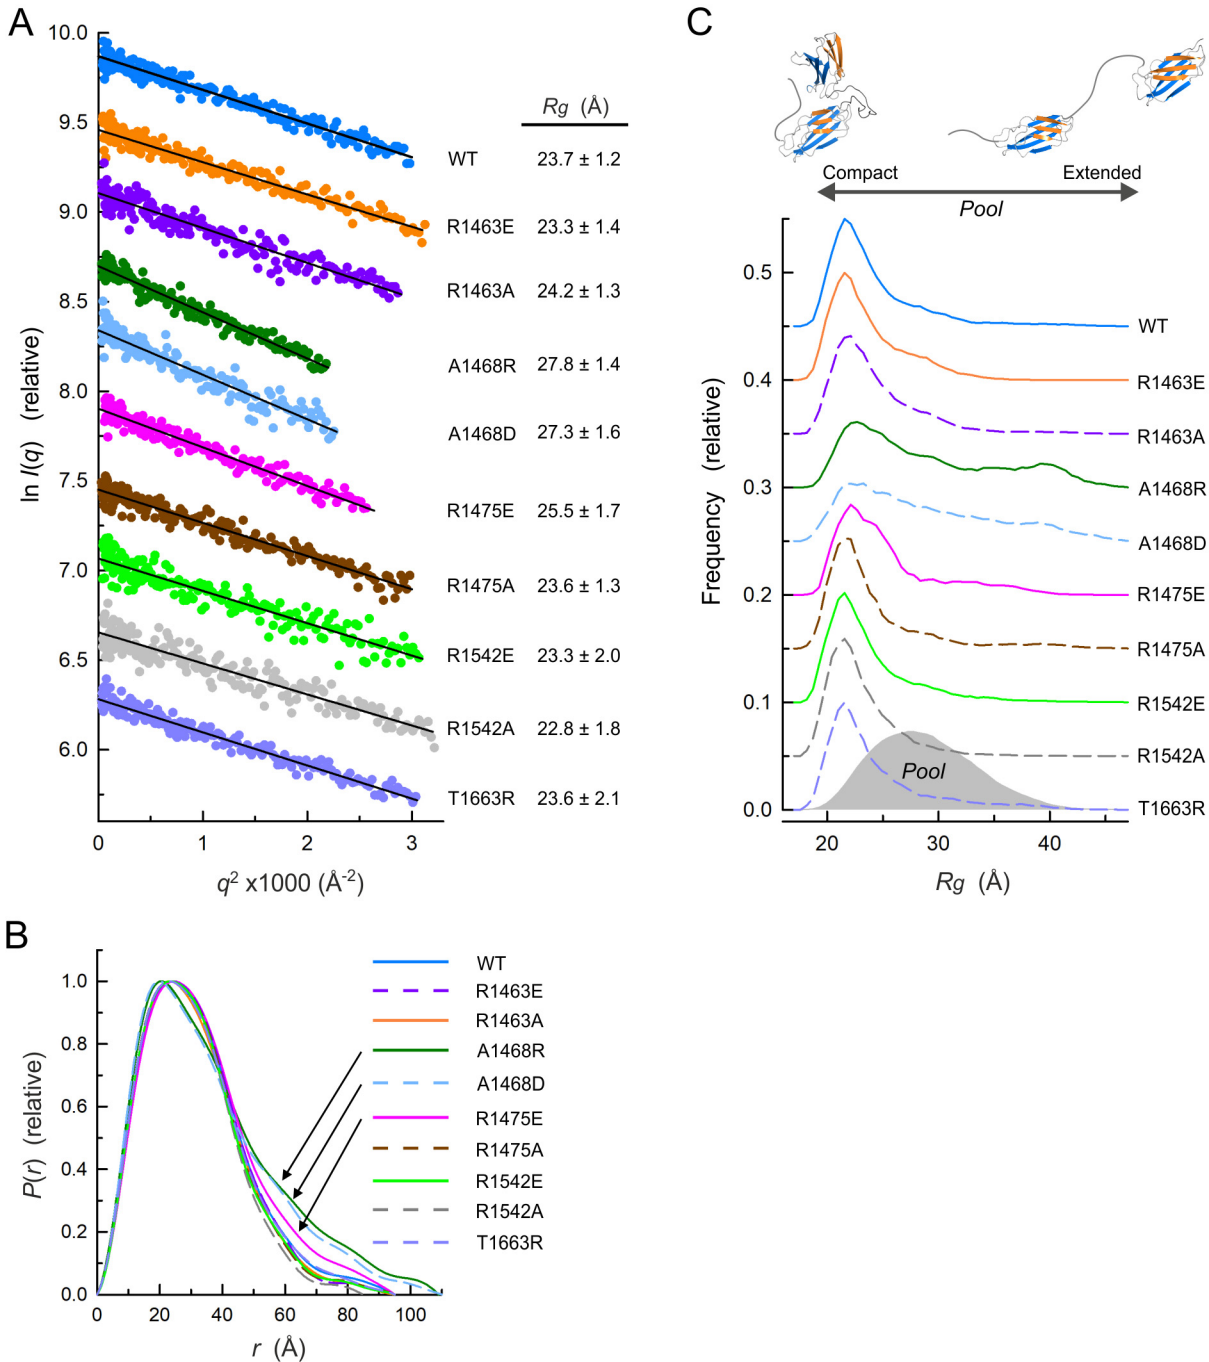

**Figure 4. Analysis by SAXS of the effect of point mutations on the structure of the CS-FnIII-3,4 region of  $\beta 4$ .** (A) Guinier plots of the SAXS data of  $\beta 4$ -CS-FnIII-3,4 WT and mutants and the derived  $R_g$  values ( $\pm$ STD). Lines are the Guinier fit. (B)  $P(r)$  functions of  $\beta 4$  WT and mutants. (C) EOM analysis of the flexibility in the WT and mutants of  $\beta 4$ -CS-FnIII-3,4. The frequency distributions of  $R_g$  in a pool of calculated models (grey area) and in the selected ensembles that fit the SAXS data of the WT and mutant proteins (lines) are shown. Plots in A and C are vertically displaced for representation.

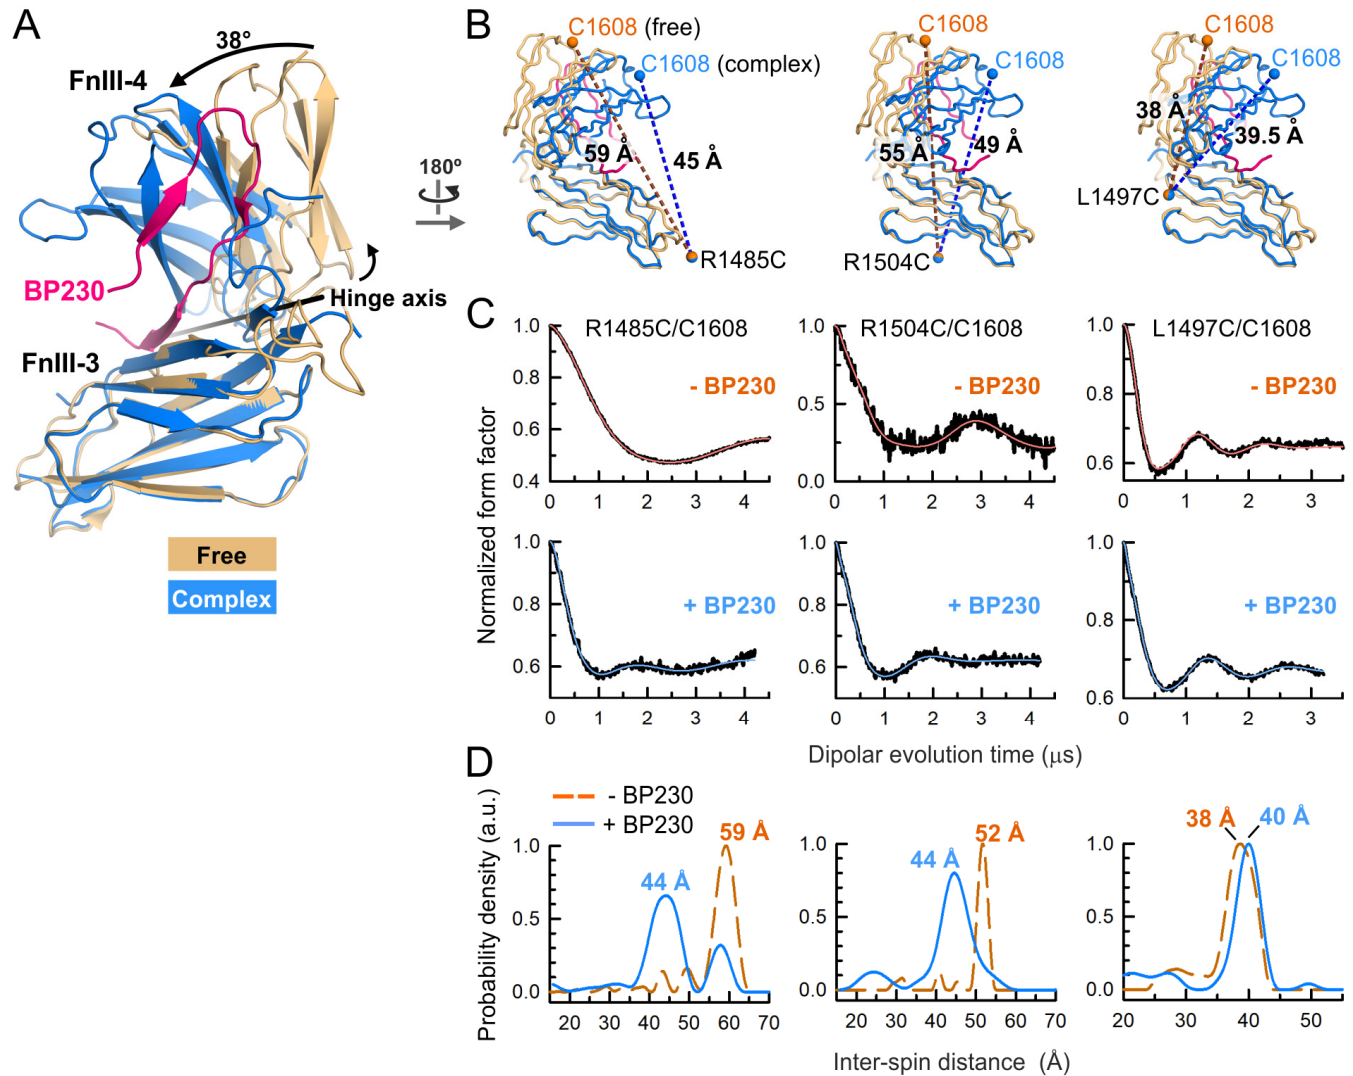

**Figure 5. BP230-induced conformational change in the FnIII-3,4 of  $\beta$ 4.** (A) Comparison of the structures of  $\beta$ 4 FnIII-3,4 in the free form (orange) and bound to BP230 ( $\beta$ 4 blue and BP230 magenta). Only the C $\alpha$  atoms of the FnIII-3 were used for the superimposition. The orientations of the FnIII-4 in the two structures are related by a rotation around a hinge axis (black line). (B) Worm models of the two structures in A. The modeled average positions of the MTSL-paramagnetic centers (spheres) attached to the Cys pairs and the distances (dashed lines) in the two conformations are shown. (C) DEER normalized dipolar evolution (black lines) and fits to the data for the MTSL-labeled  $\beta$ 4 mutants in the absence (top) and in the presence of BP230 26-55 (bottom). (D) Inter-spin distance distributions calculated from the data in C.

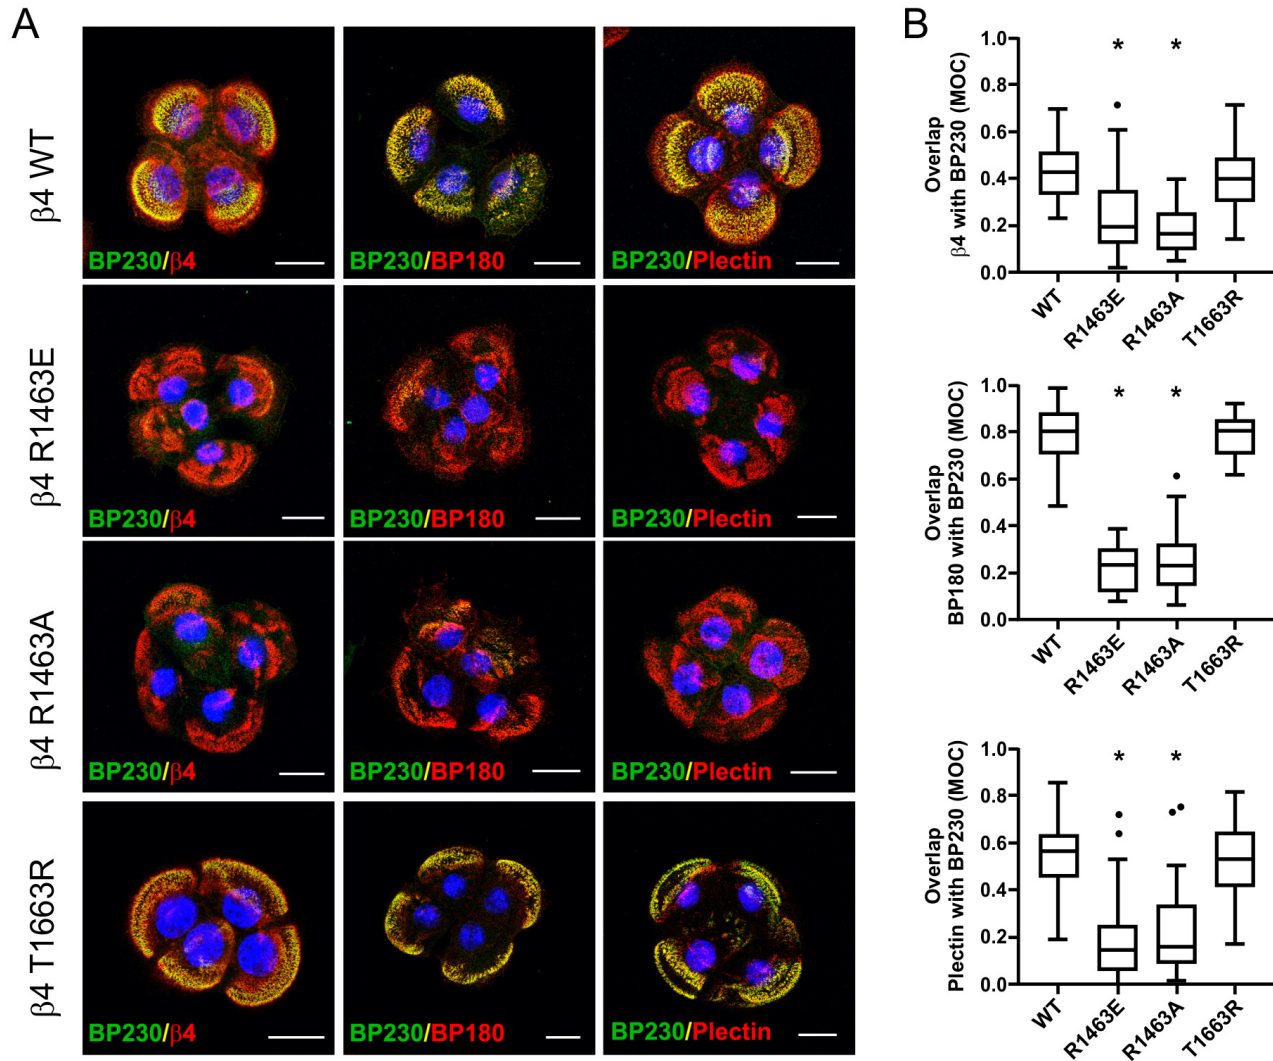

**Figure 6. Binding of BP230 N-tail to  $\beta 4$  FnIII-3,4 is necessary for the recruitment of BP230 into HDs.** (A) Confocal microscopy images of PA-JEB keratinocytes stably expressing  $\beta 4$  WT or the point mutants R1463E, R1463A, or T1663R. Cells were stained with antibodies against BP230 (green),  $\beta 4$ , BP180, or plectin (red), as indicated. Co-localization of BP230 with the other HD proteins in the presence of  $\beta 4$  WT or the high-affinity mutant T1663R appears as yellow. BP230 is diffusely distributed in the presence of the low affinity  $\beta 4$  mutants R1463E and R1463A. Nuclei were stained with DAPI (blue). Scale bars: 20  $\mu$ m. (B) Quantification of the co-localization of  $\beta 4$ , plectin or BP180 with BP230. Manders' overlap coefficients (MOC) were calculated for at least 14 images per condition (14-72 images per condition from 1-3 experiments). Tukey box plots show the median (solid line), the 25<sup>th</sup> and 75<sup>th</sup> percentiles (boxes) for each distribution; whiskers represent 1.5 times above or below the interquartile range, outlier points outside the whiskers are displayed (dots). The P-values (\* =  $P < 0.0001$ ) were calculated using the unpaired, nonparametric Mann-Whitney test.

with plectin. This prompted us to analyze the role of potentially phosphorylatable residues in the binding of BP230 to  $\beta 4$ . The region FnIII-3,4 of  $\beta 4$  contains 21 predicted putative phosphorylatable Ser/Thr residues. Of those, only T1663 is in direct contact with BP230 (Supplementary Fig S5). As described above, the phosphomimetic change T1663D reduced the affinity for BP230 (Fig 2B,C).

Another predicted phosphorylatable residue of  $\beta 4$ , S1556, is located in the inter-domain linker and it was disordered in the crystal structure. The sequence context of S1556 (PQSP) fits the optimal substrate sequence of the ERK1/2 kinases (P-X-S/T-P), which are known to phosphorylate S1356 in the CS leading to the dissociation from plectin (Frijns et al, 2010). Yet, the substitution S1556D did not affect the affinity for BP230 with respect to the WT  $\beta 4$  (Supplementary Fig S5B).

We also analyzed the role of potentially phosphorylatable residues in BP230 on the interaction with  $\beta 4$  (Fig 7A-C). There are six Ser/Thr residues in the  $\beta 4$ -binding site or next to it. The phosphomimetic substitutions S27D, S43D, S49D, and S51D did not affect the affinity for  $\beta 4$ . The substitution T39D resulted in a  $\sim 3$ -fold increase in the *K<sub>d</sub>*. Finally, the BP230 mutant S46D showed the weakest binding to  $\beta 4$ . Analysis of the effect of these point mutations on the interaction with  $\beta 4$  using a pull-down assay (Fig 7C) showed that the BP230 mutants S27D, S43D, S49D, and S51D bound to GST- $\beta 4$ -CS-FnIII-3,4 similarly as the WT protein. Only a faint amount of the mutant T39D bound to  $\beta 4$ , and no interaction was observed for the mutant S46D. Thus, there is a good agreement between the results obtained with these two orthogonal methods.

S27, S49 and S51 are at the ends of the  $\beta 4$ -binding sequence. T39 is adjacent to the inter-domain linker of  $\beta 4$  (Fig 7D); hence, the substitution T39D could disturb contacts with  $\beta 4$ . S43 docks in a relatively shallow and polar pocket of  $\beta 4$  (Fig 7E), which can accommodate the carboxylate of the mutant. S46 is covered by the inter-domain salt bridge formed by R1463 and E1659 of  $\beta 4$  (Fig 7F). Three conformers of the side chain of S46 were observed in the  $\beta 4$ (T1663R)-BP230 structure (Supplementary Fig S6), suggesting that it has high conformational freedom. The S46D substitution is likely to inhibit binding to  $\beta 4$  by interfering with the R1463-E1659 salt bridge, which is in agreement with the inhibitory effect of the R1463A substitution. The mutant S46A showed slightly higher affinity for  $\beta 4$  (Fig 7A-C); supporting the idea that the hydroxyl of S46 is not required for binding and that it imposes a penalty on the interaction. Collectively, our findings point to a potential role of T39 and S46 of BP230 and T1663 of  $\beta 4$  in the regulation of the interaction.

## Discussion

Integrin  $\alpha 6\beta 4$  binds to plectin and BP230 through similar regions, formed by pairs of tandem FnIII domains. But these interactions occur through very distinct mechanisms. The FnIII-1,2 region of  $\beta 4$  has an extended shape and binds to the ABD of plectin, which is a globular domain. On the other hand, the FnIII-3,4 adopts a compact shape and recognizes a linear sequence of BP230. This illustrates the high plasticity of the FnIII fold to mediate protein-protein interactions and the specialization of the FnIII domains of  $\beta 4$ .

It is not known if other proteins might bind to  $\alpha 6\beta 4$  via the BP230-binding site. The  $\beta 4$ -binding sequence of BP230 does not have detectable global similarity with other proteins. Yet, since the interaction is apparently determined by a few residues of BP230, mainly those that dock into pockets of  $\beta 4$ , it can not be excluded that other yet unidentified proteins could fit into the BP230-binding site of  $\beta 4$ , or at least occupy a section of it, when  $\alpha 6\beta 4$  is not part of type I HDs.

Incorporation of BP230 into HDs requires the previous interaction between plectin and  $\alpha 6\beta 4$ , and the recruitment of BP180. This is depicted in a hierarchical model for the assembly of HDs (Koster et al, 2003; Wilhelmssen et al, 2006). The mechanisms by which the recruitment of BP230 to HDs takes place only at the final stage of assembly remained largely uncharacterized. BP230 interacts with the cytoplasmic domains of  $\beta 4$  and BP180. The region 293-549 of BP230, which corresponds to the SR3-SR4-SH3-SR5 segment of its plakin domain, interacts with BP180, and this region of BP230 is required for the efficient recruitment into HDs (Koster et al, 2003). We have shown that point mutations in the FnIII-3,4 of  $\beta 4$  that disrupt the BP230-binding interface and the direct interaction *in vitro*, also prevent the recruitment of BP230 to HDs in keratinocytes in culture. This suggests that binding to  $\beta 4$ , as observed in the 3D structure of the  $\beta 4$ -BP230 complex, is essential for the incorporation of BP230 in the HDs.

Besides providing additional binding sites, BP180, which binds to FnIII-3 (Koster et al, 2003), or plectin might favor the  $\beta 4$ -dependent recruitment of BP230 by regulating the affinity of the BP230- $\beta 4$  interaction. BP230 binds to a pre-arranged interaction interface in  $\beta 4$ , which is available in the isolated FnIII-3,4 fragment, and binding of BP230 causes a movement of the relative orientation of the FnIII-3 and FnIII-4 domains. In the full-length  $\alpha 6\beta 4$ , the cytodomain of  $\beta 4$  adopts a folded-over conformation in which the C-tail is positioned very close to the CS (Frijns et al, 2012), possibly through a direct intramolecular interaction between the CS and the C-tail (Koster et al, 2004; Rezniczek et al, 1998; Schaapveld et al, 1998). Given that the CS and C-tail flank the FnIII-3,4 region, this intramolecular clasp might mask the BP230-binding site in the FnIII-3,4 or might reduce the interdomain flexibility of  $\beta 4$  impeding the conformational change linked to the

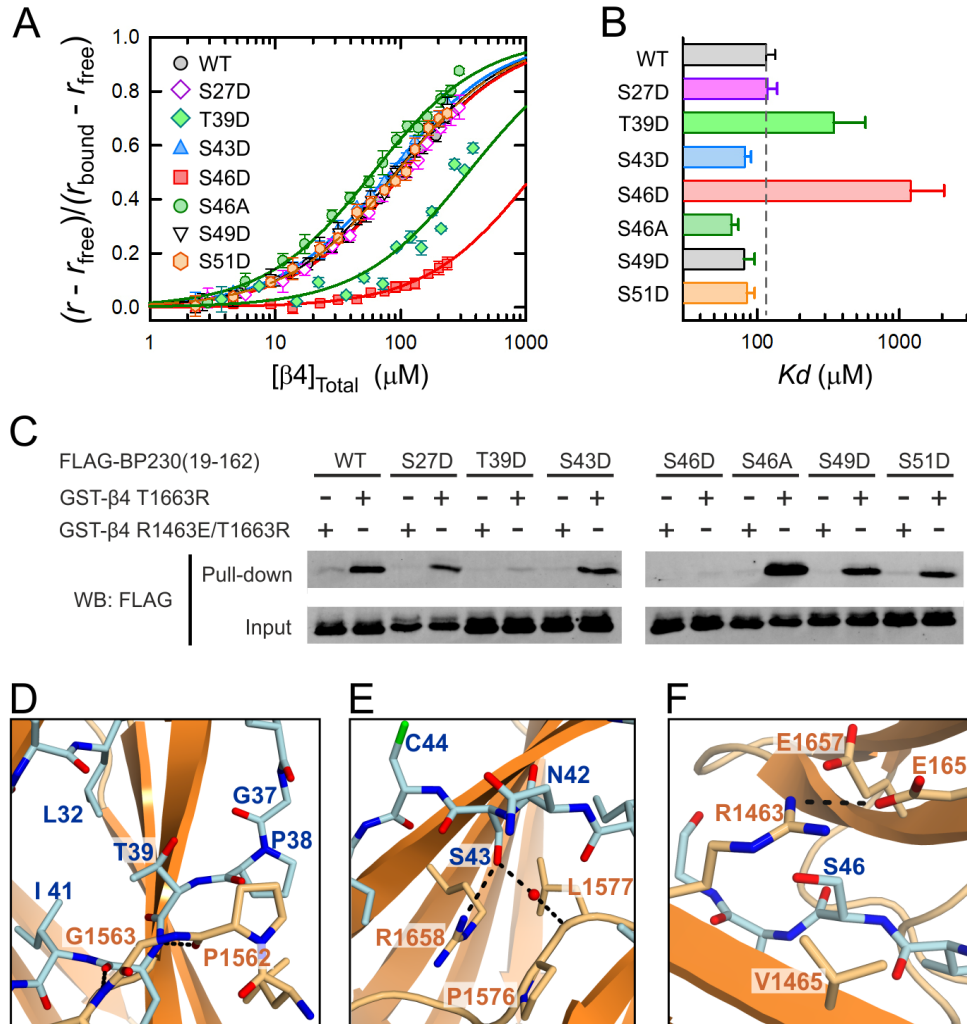

**Figure 7. Effect of phosphomimetic mutations in BP230 on the binding to  $\beta 4$ .** (A) Equilibrium binding of  $\beta 4$ -CS-FnIII-3,4 to the BP230 10-162 fragment, WT and point mutants, measured by fluorescence anisotropy. Lines represent the fit to the data. (B) Bar-chart of the  $K_d$  values in A. Error bars show STD (2-3 experiments). (C) Pull-down analysis of the interaction between FLAG-BP230 (19-162), WT and point mutants, and GST- $\beta 4$  (1436-1666)-T1663R. The BP230 binding-deficient double mutant R1463E/T1663R was used as a negative control. BP230 proteins in the cell lysates (input) and in the bound samples (pull-down) were analyzed by WB with an anti-FLAG antibody. (D-F) Detail of the structural environment of T39 (D), S43 (E) and S46 (F) of BP230 in the complex.

binding of BP230. Plectin binds to  $\beta 4$  at two sites. The ABD binds to the FnIII-1,2 and the beginning of the CS of  $\beta 4$ , and this interaction induces a reorganization of that part of the CS (de Pereda et al, 2009). In a second site of contact, the plakin domain of plectin binds to the CS and the C-tail of  $\beta 4$ . Thus, plectin binding to  $\beta 4$  might alter the organization of the CS and C-tail, and as a consequence that of the FnIII-3,4. BP180 might also affect the FnIII-3,4 region through its interaction with the FnIII-3. In summary, plectin and BP180 could also favor allosterically the interaction between BP230 and  $\beta 4$  by exposing the BP230-binding site or by reducing its rigidity.

The regulation of the interaction between  $\beta 4$  and plectin, mainly through the phosphorylation of the  $\beta 4$  at specific Ser and Thr residues, plays a major role in the disassembly of HDs in keratinocytes. Phosphorylation of S1356 and S1364 in the CS prevents the association with the ABD of plectin, and phosphorylation of T1736 in the C-tail of  $\beta 4$  reduces the interaction with the plakin domain of plectin (Frijns et al, 2012). It is unclear if other interactions in the HDs are directly inhibited during the disassembly, or if they are lost as a consequence of the disruption of the  $\beta 4$ -plectin complex. Phosphorylation of S1424 in the CS of  $\beta 4$  is linked to a reduced association of  $\beta 4$  with BP180 in migrating keratinocytes (Germain et al, 2009). S1424 is located outside the region of  $\beta 4$  that interacts with BP180 (i.e. the FnIII-3) and it is not known if phosphorylation of S1424 reduces the affinity for BP180 directly. BP180 is also phosphorylated, probably at Ser/Thr, upon activation of PKC, which is linked to the dissociation of BP180 from HDs (Kitajima et al, 1999). Yet, it is not clear if the PKC-mediated phosphorylation of BP180 disrupts its interactions with other hemidesmosomal proteins and it is required for the mobilization of BP180 from HDs, or if PKC mobilizes indirectly BP180 through the phosphorylation of  $\beta 4$  and the disruption of the  $\beta 4$ -plectin interaction.

We have identified three potentially phosphorylatable residues, T1663 in  $\beta 4$  and T39 and S46 in BP230, which are critical for the BP230- $\beta 4$  interaction. Substitution of these residues with Asp severely reduced the interaction. Of those, the strongest inhibition was observed for the S46D mutant of BP230. S46 is highly conserved; out of 35 species analyzed, 34 orthologs of BP230 have a Ser in this position, which is replaced by Thr in coelacanths (Supplementary Fig S3). The conservation of S46 is striking because the hydroxyl group destabilizes, albeit moderately, the binding to  $\beta 4$ . This suggests that there has been a pressure to retain a Ser/Thr in this position. On the one hand, S46 could limit the affinity for  $\beta 4$ , which in turn could allow for an indirect regulation of the BP230- $\beta 4$  interaction during phases of HD assembly and disassembly. Alternatively, S46 might be a site for the direct regulation of the interaction. Phosphorylation of the N-tail of BP230 has not been described during HD disassembly. Nonetheless, since several kinases act on  $\beta 4$  and BP180, it is reasonable that other proteins present in the HD niche

might be phosphorylated as well. Future studies will be required to assess whether BP230 is post-translationally modified during the mobilization of hemidesmosomal proteins and whether active disruption of the BP230- $\beta 4$  interaction could play a role in the disassembly of HD.

The detailed structural and mechanistic characterization of the  $\beta 4$ -BP230 interaction presented herein will allow the design of specific experiments to investigate its regulation in normal keratinocytes during resting state, proliferation, and migration, as well as in invasive carcinoma cells.

## Materials and methods

### Protein expression and purification

The cDNA sequences coding for the fragments 1-162, 10-162, 19-162, 28-162, 32-162, 37-162, 41-162, 46-162, and 56-162 of human BP230 (Uniprot Q03001-8), and for the fragment 1436-1666 of human integrin  $\beta 4$  (Uniprot P16144-2) were cloned into a modified pET15b vector (pETEV15b) (Alonso-García et al, 2009). Plasmids encoding for the  $\beta 4$  fragments 1457-1666, 1457-1548, and 1572-1666 in pETEV15b were described earlier (Alonso-García et al, 2015). The cDNA coding for a chimeric protein consisting of BP230 residues 19-58 and the SR2 of plectin, residues 420-530 (UniprotKB Q15149-2), was constructed by polymerase chain reactions (PCR) and was cloned in the same vector. The cDNA of  $\beta 4$  (1436-1666) was also subcloned into a pGEX-4T3 vector that was modified to have restriction sites compatible with pET15b. Point mutations were introduced by PCR using the QuikChange method. The correctness of all constructs was verified by DNA sequencing.

Proteins were expressed in *Escherichia coli* strain BL21(DE3). The SR2 (56-162) of BP230 and the  $\beta 4$  proteins were produced soluble and were purified by affinity chromatography as described (Manso et al, 2016). Other BP230 recombinant proteins were produced insoluble; they were purified under denaturing conditions and were refolded by rapid dilution as described (Alonso-García et al, 2009). The His-tag was cleaved by digestion with TEV (tobacco etch virus) protease, unless otherwise indicated. GST- $\beta 4$  (1436-1666) proteins were purified by affinity chromatography using a glutathione-agarose column.

### Peptides

Peptides corresponding to the regions of BP230 26-46, 37-55, and 26-55 were custom synthesized labeled with N-terminal fluorescein (Thermo Fisher Scientific). Unlabeled peptide 26-55 was obtained from Genosphere Biotechnologies.

### Size exclusion chromatography

Samples were analyzed using a Superdex 200 10/300 GL column (GE Healthcare) equilibrated in 20 mM Tris (pH 7.5), 150 mM NaCl, 0.5 mM tris(2-carboxyethyl)phosphine. The injection volume was 100  $\mu$ l and the flow rate was 0.5 ml/min. Fractions of 0.5 ml were collected, and they were analyzed by SDS-polyacrylamide gel electrophoresis (SDS-PAGE).

### Labeling of proteins with Oregon Green 488

BP230 proteins were labeled in thiol groups with Oregon Green 488 iodoacetamide (Invitrogen). Proteins at 250  $\mu$ M in 20 mM Tris (pH 8.0), 150 mM NaCl were incubated overnight at 4 °C with a 10-fold molar excess of the fluorescence probe. The reaction was stopped by adding a 10-fold molar excess of dithiothreitol (DTT) over the reagent and the proteins were separated from the unreacted probe by SEC using a Sephadex G25 (1 x 30 cm) column.

### Fluorescence-based binding assay

Labeled BP230 proteins and peptides at 1  $\mu$ M in 20 mM Na-phosphate (pH 7.5), 150 mM NaCl, 1 mg/ml bovine serum albumin (BSA), unless otherwise indicated, were titrated with  $\beta$ 4-CS-FnIII-3,4. The fluorescence anisotropy of the probe was measured with a FluoroMax-3 spectrofluorometer (HORIBA-Jobin-Yvon), using 496 nm (2 nm bandwidth) excitation wavelength and collecting the emission at 518 nm (5 nm bandwidth). The  $K_d$  and the fluorescence anisotropy of the free ( $r_F$ ) and fully bound ( $r_B$ ) states were estimated by fitting the following equation of a 1:1 binding model:

$$r = r_F + \left[ (r_B - r_F) \left( \frac{\gamma - \sqrt{\gamma^2 - 4[\beta 4]_T [\text{BP230}]_T}}{2[\beta 4]_T} \right) \right]$$
$$\gamma = K_d + [\beta 4]_T + [\text{BP230}]_T$$

Where,  $[\text{BP230}]_T$  is the total concentration of labeled-BP230,  $[\beta 4]_T$  is the total concentration of  $\beta$ 4 added, and  $r$  is the observed fluorescence anisotropy of the probe.

### Crystallization and determination of the structure of the $\beta$ 4-BP230 complex

Samples of the  $\beta$ 4-FnIII-3,4 (1457-1666) mutant T1663R in complex with the peptide of BP230 (26-55) were prepared by adding 300  $\mu$ M of peptide from a 6 mM stock in dimethyl sulfoxide (DMSO) to a 210  $\mu$ M (5 mg/ml) solution of  $\beta$ 4-FnIII-3,4 in 10 mM Tris (pH 7.5), 100 mM NaCl, 2 mM DTT. The sample was then extensively dialyzed against the same buffer to remove the DMSO using membranes of 0.5-1 kDa molecular weight cut-off. Crystals were obtained at room temperature by vapor diffusion mixing equal volumes of the  $\beta$ 4-BP230 complex at 2.5 mg/ml and crystallization solution. The best

crystals were obtained using as crystallization solution 0.1 M Na-acetate (pH 5.0), 20% PEG 6000, 0.2 M  $\text{MgCl}_2$ . Crystals were transferred to a similar solution containing 25% glycerol and were flashed-cooled in liquid nitrogen. Data were collected at 100 K on the Xaloc beam line of the ALBA synchrotron (Barcelona, Spain) (Juanhuix et al, 2014). A high multiplicity dataset was obtained by combining three sets of 1800 images, 0.2° oscillation per image, measured at three positions of a single crystal. Diffraction data of these and all other crystals were processed with the XDS suite (Kabsch, 2010).

Crystals belong to the space group C2 (Table 1) and contain one copy of the complex in the asymmetric unit (~46% solvent content). The structure was phased by molecular replacement with the program Phaser (McCoy et al, 2007) using the structures of the individual FnIII-3 and FnIII-4 domains (PDB codes 4WTW and 4WTX). The structure was refined against data extending to 1.55 Å resolution with phenix.refine (Afonine et al, 2012), alternated with model building in Coot (Emsley et al, 2010). Refinement included overall anisotropic and bulk solvent corrections, positional refinement, restrained refinement of individual B-factor, and refinement of the translation/libration/screw-rotation (TLS) parameters of eight groups in  $\beta$ 4 and two in BP230. The refined model had excellent geometry and included residues 1457-1481, 1486-1552, and 1557-1665 of  $\beta$ 4, residues 27-50 of BP230, 104 molecules of water, and two molecules of glycerol. Detailed statistics of the refinement are shown in Table 1.

Samples of the WT  $\beta$ 4-FnIII-3,4 in complex with BP230 26-55, were prepared as for the mutant. Crystals were obtained using as crystallization solution 0.1 M phosphate-citrate (pH 4.2), 20% PEG 8000, 0.2 M NaCl. Crystals were cryoprotected with 25% glycerol in the crystallization solution and were flashed cooled in liquid nitrogen. Diffraction data were collected at 100 K on the i03 beam line of the Diamond Light Source (Didcot, United Kingdom).

Crystals of the WT  $\beta$ 4-BP230 complex were isomorphous with the  $\beta$ 4(T1663R)-BP230 crystals. The structure was solved starting from the coordinates of the mutant complex and was refined against data extending to 2.05 Å. After rigid body fitting, the refinement was done as for the mutant, with the exception that only four TLS groups were refined. The refined model included residues 1457-1483, 1486-1551, and 1561-1666 of  $\beta$ 4, residues 27-49 of BP230, and 46 molecules of water (Table 1).

### SAXS measurements and analysis

SAXS data were measured at the P12 beamline of the European Molecular Biology Laboratory (EMBL) at the Deutsches Elektronen-Synchrotron (Hamburg, Germany) using radiation of wavelength ( $\lambda$ ) 1.24 Å and a Pilatus 2M detector (Dectris) (Blanchet et al, 2015). Samples of  $\beta$ 4-CS-

FnIII-3,4 WT and point mutants were equilibrated in 20 mM Na-phosphate (pH 7.5), 150 mM NaCl, 5% glycerol, 3 mM DTT. Samples at various concentrations were prepared by 2-fold serial dilutions as indicated in the Supplementary Table S1. SAXS data from protein samples and their buffers were measured consecutively at 10 °C. Data were collected for a range of the scattering-vector from 0.01 to 0.45 Å<sup>-1</sup> ( $q=(4\pi\sin\theta)/\lambda$ , where  $2\theta$  is the scattering angle). Data were processed and analyzed using the ATSAS package (Franke et al, 2017). Guinier analysis was done with the program AUTORG (Petoukhov et al, 2007).  $P(r)$  functions were calculated using data to  $q \leq 0.30$  Å<sup>-1</sup> with the program GNOM (Svergun, 1992). Inter-domain flexibility was analyzed using the Ensemble Optimization Method with the program EOM 2.1 (Tria et al, 2015). First, a pool of 15,000 theoretical conformers that represent the potential conformation diversity of the  $\beta$ 4-CS-FnIII-3,4 was generated treating the FnIII domains as rigid bodies and the CS and the linker as flexible regions. Then, combinations of the theoretical scattering profiles of the models were fitted to the experimental curves.

### **Site-directed spin labeling and DEER measurements and analysis**

The mutant proteins of  $\beta$ 4-FnIII-3,4 containing two cysteines R1485C/C1608, R1504C/C1608, and L1497C/C1608, all of which also carried the changes C1559A/C1483S/T1663R, were labeled with the thiol-reactive paramagnetic probe *S*-(1-oxyl-2,2,5,5-tetramethyl-2,5-dihydro-1*H*-pyrrol-3-yl)methyl methanesulfonylthioate (MTSL) as described (Alonso-Garcia et al, 2015). Solutions of MTSL-labeled proteins between 70 to 100  $\mu$ M in 20 mM Na-phosphate (pH 7.5), 150 mM NaCl, without or with ~5-fold molar excess of BP230 26-55, were mixed with deuterated glycerol in a 2:1 ratio to obtain a vitrified solution with longer transverse relaxation times upon freezing; they were subsequently transferred into 3 mm OD quartz tubes and stored in liquid nitrogen until measurement.

DEER measurements were performed at a temperature of 50 K in a Q-band (~ 34 GHz) home-made EPR spectrometer (Gromov et al, 2001) equipped with a rectangular TE(102) cavity allowing for big sample volumes (Tschaggelar et al, 2009). The two-frequency 4-pulse DEER sequence (Pannier et al, 2000) was used setting the pump pulses at the maximum of the nitroxide spectrum. The DEER traces were processed with DeerAnalysis, an ad hoc toolbox programmed for MATLAB (Jeschke et al, 2006) and analyzed using a model-free Tikhonov regularization implemented in the same software to obtain the distance distributions.

### **Structure and sequence analysis**

Pairwise superimposition of structures was done using the program LSQKAB (Kabsch, 1976). Domain motions that relate the BP230-bound and the free structures of  $\beta$ 4-FnIII-3,4 were analyzed with the program DynDom

(Hayward & Berendsen, 1998). Evolutionary conservation scores were calculated using the ConSurf Server (Ashkenazy et al, 2016). Prediction of the sequence tolerance within the  $\beta$ 4-binding site of BP230 was done using the Sequence Tolerance method (Smith & Kortemme, 2011) as implemented in the ROSIE Server of the Rosetta molecular modeling package (Lyskov et al, 2013). Molecular figures were created with PyMOL (Schrödinger, 2015). Analysis of potentially phosphorylatable sites was done using the Phosphonet server (Kinexus Bioinformatics) (<http://www.phosphonet.ca/>).

### **Antibodies**

The following primary antibodies were used: mouse monoclonal antibody (mAb) 450-11A against  $\beta$ 4 (BD Bioscience), human mAb 5E against BP230 (Ishiko et al, 1993), mouse mAb 233 against BP180 (Nishizawa et al, 1993), guinea pig polyclonal antibody (pAb) P1 against plectin (Stegh et al, 2000), and rabbit pAb D-8 against FLAG (Santa Cruz Biotechnology). Secondary antibodies were as follows: goat anti-mouse Texas Red (Invitrogen), goat anti-human Alexa Fluor 488 (Invitrogen), goat anti-guinea pig Alexa Fluor 488 (Invitrogen), and donkey anti-human Texas Red (Jackson ImmunoResearch).

### **cDNA constructs for expression in mammalian cell cultures**

Point mutations R1463E, R1463A, C1559A, and T1663R were introduced by site directed mutagenesis (see above) in a construct coding full-length  $\beta$ 4 in the pUC18 vector (Niessen et al, 1997b). Retroviral vectors with mutant  $\beta$ 4 cDNAs were generated by subcloning the mutant  $\beta$ 4 cDNAs in the LZRS-MS-IRES-ZEO vector as described (Frijns et al, 2012).

The cDNA coding for the region 19-162 of BP230 was amplified by PCR using primers that added *EcoRI* and *NotI* sites at each end, respectively. The PCR product was digested and was cloned using the same sites in the pCEF-FLAG vector (Chiariello et al, 2000), which codes for an N-terminal FLAG tag. Point mutations were introduced in this construct by site-directed mutagenesis.

### **Cell culture and immunofluorescence**

Immortalized keratinocytes derived from a patient with Pyloric Atresia associated with Junctional Epidermolysis Bullosa (PA-JEB) have already been described (Schaapveld et al, 1998). PA-JEB/ $\beta$ 4 keratinocytes stably expressing WT or point mutants of  $\beta$ 4 were generated by retroviral transduction as described (Sterk et al, 2000). For immunostaining, PA-JEB/ $\beta$ 4 cells were seeded on glass coverslips, fixed in 1% paraformaldehyde in PBS, permeabilized with 0.2% Triton X-100 in PBS for 5 min, blocked with 2% BSA in PBS, and incubated for 1 h with the following primary antibodies: 5E anti BP230 (dilution 1:500), 450-11A against  $\beta$ 4 (dilution 1:500), P1 against plectin (dilution 1:200), and 233 against BP180 (undiluted).



Cells were washed three times with PBS and were incubated with the secondary antibodies for 1 h. Cells were washed three times with PBS, stained with 4',6-diamidino-2-phenylindole (DAPI, Sigma), and washed again three times with PBS. Finally, the coverslips were mounted onto glass slides in Mowiol-DABCO and observed using a Leica TCS SP5 confocal microscope.

The degree of co-localization between BP230 and  $\beta 4$ , plectin or BP180 was quantified using the Manders' overlap coefficients (MOC) calculated with the JACoP plugin from Image-J (Bolte & Cordelières, 2006). Statistical significance was analysed using unpaired, nonparametric Mann-Whitney test in GraphPad.

### **Pull-down assay**

HEK293T cells were maintained in Dulbecco's modified Eagle's medium supplemented with 10% fetal bovine serum. Transfection with pCEF-FLAG-BP230 (19-162) constructs was done using polyethylenimine (PEI) (PEI:DNA ratio 2:1). 48 h after transfection cells were lysed in lysis buffer consisting of 20 mM Tris (pH 7.5), 500 mM NaCl, 0.5% Triton X-100, 1 mM  $\text{Na}_3\text{VO}_4$ , 25 mM NaF, 1 mM PMSF, and protease inhibitor cocktail (Roche). Lysates were cleared by centrifugation at 16000 x g for 15 min at 4 °C. Supernatants were incubated for 1 hour at 4 °C with 0.6 nmoles of the GST- $\beta 4$  (1436-1666) T1663R or the inactive double mutant R1463E/T1663R and 20  $\mu\text{l}$  of glutathione-agarose resin (Agarose Bead Technologies). The resin was washed four times with lysis buffer and the bound proteins were extracted with SDS-PAGE sample buffer. Bound FLAG-BP230 proteins were analyzed by immunoblotting using anti-FLAG antibody and as secondary antibody a goat anti-rabbit IgG DyLight 800 (Thermo Fisher). Results were detected by infrared fluorescence using an Odyssey imaging system (Li-Cor).

### **Data availability**

Coordinates and structure factors have been deposited to the Protein Data Bank (PDB) under the accession numbers 6GVL ( $\beta 4$ (WT)-BP230) and 6GVK ( $\beta 4$ (T1663R)-BP230); raw diffraction images have been deposited in the Zenodo repository (DOI 10.5281/zenodo.1287191 and 10.5281/zenodo.1286853). SAXS data have been deposited in the Small Angle Scattering Biological Data Bank (SASBDB) under codes SASDDE8, SASDDF8, SASDDG8, SASDDH8, SASDDJ8, SASDDK8, SASDDL8, SASDDM8, SASDDN8, and SASDDP8. Other data are available from the corresponding authors upon reasonable request.

### **Acknowledgments**

We thank Prof Gunnar Jeschke for access to the EPR spectrometer. Lisa te Molder is thanked for assistance with image analysis and statistical analysis of data. We acknowledge ALBA-CELLS, Diamond Light Source

(proposal MX10121), and the EMBL for access to synchrotron radiation facilities. This work was supported by the Spanish Ministry of Science, Innovation and Universities and the European Regional Development Fund (grants BFU2009-08389 and BFU2015-69499-P to JMdP). MGH, AC, and NAG were recipients of training grants from University of Salamanca, Spanish Ministry of Education, Culture and Sport (FPU14/06259), and Consejo Superior de Investigaciones Científicas, respectively. This research received funding from the European Community's Seventh Framework Programme (FP7/2007-2013) under BioStruct-X (grant agreement N°283570).

### **Author contributions**

JAM, MGH, and NAG did the mutagenesis and fluorescence interaction experiments; AC performed the pull-down experiments; JAM did the crystallographic studies; JAM, AC and JMdP did the SAXS analysis; MK and AS performed the immunofluorescence experiments; IGR did the DEER experiments. JAM, MGH, AC, IGR, AS, and JMdP conceived the experiments and analyzed the data. JAM, IGR, AS, and JMdP wrote the manuscript with contributions of all authors. All authors read and approved the final manuscript.

### **Conflict of interest**

The authors declare no competing financial interests.

### **References**

- Afonine PV, Grosse-Kunstleve RW, Echols N, Headd JJ, Moriarty NW, Mustyakimov M, Terwilliger TC, Urzhumtsev A, Zwart PH, Adams PD (2012) Towards automated crystallographic structure refinement with phenix.refine. *Acta Crystallogr D Biol Crystallogr* **68**: 352-367
- Afonine PV, Moriarty NW, Mustyakimov M, Sobolev OV, Terwilliger TC, Turk D, Urzhumtsev A, Adams PD (2015) FEM: feature-enhanced map. *Acta Crystallogr D Biol Crystallogr* **71**: 646-666
- Alonso-García N, García-Rubio I, Manso JA, Buey RM, Urien H, Sonnenberg A, Jeschke G, de Pereda JM (2015) Combination of X-ray crystallography, SAXS and DEER to obtain the structure of the FnIII-3,4 domains of integrin  $\alpha 6\beta 4$ . *Acta Crystallogr D Biol Crystallogr* **71**: 969-985
- Alonso-García N, Ingles-Prieto A, Sonnenberg A, De Pereda JM (2009) Structure of the Calx-beta domain of the integrin  $\beta 4$  subunit: insights into function and cation-independent stability. *Acta Crystallogr D Biol Crystallogr* **65**: 858-871
- Ashkenazy H, Abadi S, Martz E, Chay O, Mayrose I, Pupko T, Ben-Tal N (2016) ConSurf 2016: an improved methodology to

- estimate and visualize evolutionary conservation in macromolecules. *Nucleic Acids Res* **44**: W344-350
- Blanchet CE, Spilotros A, Schwemmer F, Graewert MA, Kikhney A, Jeffries CM, Franke D, Mark D, Zengerle R, Cipriani F, Fiedler S, Roessle M, Svergun DI (2015) Versatile sample environments and automation for biological solution X-ray scattering experiments at the P12 beamline (PETRA III, DESY). *J Appl Cryst* **48**: 431-443
- Bolte S, Cordelieres FP (2006) A guided tour into subcellular colocalization analysis in light microscopy. *J Microsc* **224**: 213-232
- Chiariello M, Marinissen MJ, Gutkind JS (2000) Multiple mitogen-activated protein kinase signaling pathways connect the cot oncoprotein to the c-jun promoter and to cellular transformation. *Mol Cell Biol* **20**: 1747-1758
- Davis IW, Leaver-Fay A, Chen VB, Block JN, Kapral GJ, Wang X, Murray LW, Arendall WB, 3rd, Snoeyink J, Richardson JS, Richardson DC (2007) MolProbity: all-atom contacts and structure validation for proteins and nucleic acids. *Nucleic Acids Res* **35**: W375-383
- de Pereda JM, Lillo MP, Sonnenberg A (2009) Structural basis of the interaction between integrin alpha6beta4 and plectin at the hemidesmosomes. *EMBO J* **28**: 1180-1190
- Diederichs K, Karplus PA (1997) Improved R-factors for diffraction data analysis in macromolecular crystallography. *Nat Struct Biol* **4**: 269-275
- Emsley P, Lohkamp B, Scott WG, Cowtan K (2010) Features and development of Coot. *Acta Crystallogr D Biol Crystallogr* **66**: 486-501
- Fontao L, Favre B, Riou S, Geerts D, Jaunin F, Saurat JH, Green KJ, Sonnenberg A, Borradori L (2003) Interaction of the bullous pemphigoid antigen 1 (BP230) and desmoplakin with intermediate filaments is mediated by distinct sequences within their COOH terminus. *Mol Biol Cell* **14**: 1978-1992
- Franke D, Petoukhov MV, Konarev PV, Panjkovich A, Tuukkanen A, Mertens HDT, Kikhney AG, Hajizadeh NR, Franklin JM, Jeffries CM, Svergun DI (2017) ATSAS 2.8: a comprehensive data analysis suite for small-angle scattering from macromolecular solutions. *J Appl Cryst* **50**: 1212-1225
- Frijns E, Kuikman I, Litjens S, Raspe M, Jalink K, Ports M, Wilhelmsen K, Sonnenberg A (2012) Phosphorylation of threonine 1736 in the C-terminal tail of integrin beta4 contributes to hemidesmosome disassembly. *Mol Biol Cell* **23**: 1475-1485
- Frijns E, Sachs N, Kreft M, Wilhelmsen K, Sonnenberg A (2010) EGF-induced MAPK signaling inhibits hemidesmosome formation through phosphorylation of the integrin {beta}4. *J Biol Chem* **285**: 37650-37662
- Fujiwara S, Matsui TS, Ohashi K, Deguchi S, Mizuno K (2018) Solo, a RhoA-targeting guanine nucleotide exchange factor, is critical for hemidesmosome formation and acinar development in epithelial cells. *PLoS One* **13**: e0195124
- Geerts D, Fontao L, Nievers MG, Schaapveld RQ, Purkis PE, Wheeler GN, Lane EB, Leigh IM, Sonnenberg A (1999) Binding of integrin alpha6beta4 to plectin prevents plectin association with F-actin but does not interfere with intermediate filament binding. *J Cell Biol* **147**: 417-434.
- Germain EC, Santos TM, Rabinovitz I (2009) Phosphorylation of a novel site on the {beta}4 integrin at the trailing edge of migrating cells promotes hemidesmosome disassembly. *Mol Biol Cell* **20**: 56-67
- Gipson IK, Spurr-Michaud S, Tisdale A, Elwell J, Stepp MA (1993) Redistribution of the hemidesmosome components alpha 6 beta 4 integrin and bullous pemphigoid antigens during epithelial wound healing. *Exp Cell Res* **207**: 86-98
- Gromov I, Shane J, Forrer J, Rakhmatoullin R, Roentzwaig Y, Schweiger A (2001) A Q-band pulse EPR/ENDOR spectrometer and the implementation of advanced one- and two-dimensional pulse EPR methodology. *J Magn Reson* **149**: 196-203
- Groves RW, Liu L, Dopping-Hepenstal PJ, Markus HS, Lovell PA, Ozoemena L, Lai-Cheong JE, Gawler J, Owaribe K, Hashimoto T, Mellerio JE, Mee JB, McGrath JA (2010) A homozygous nonsense mutation within the dystonin gene coding for the coiled-coil domain of the epithelial isoform of BPAG1 underlies a new subtype of autosomal recessive epidermolysis bullosa simplex. *J Invest Dermatol* **130**: 1551-1557
- Guo L, Degenstein L, Dowling J, Yu QC, Wollmann R, Perman B, Fuchs E (1995) Gene targeting of BPAG1: abnormalities in mechanical strength and cell migration in stratified epithelia and neurologic degeneration. *Cell* **81**: 233-243
- Hayward S, Berendsen HJ (1998) Systematic analysis of domain motions in proteins from conformational change: new results on citrate synthase and T4 lysozyme. *Proteins* **30**: 144-154
- Herold-Mende C, Kartenbeck J, Tomakidi P, Bosch FX (2001) Metastatic growth of squamous cell carcinomas is correlated with upregulation and redistribution of hemidesmosomal components. *Cell Tissue Res* **306**: 399-408
- Hopkinson SB, Jones JC (2000) The N terminus of the transmembrane protein BP180 interacts with the N-terminal domain of BP230, thereby mediating keratin cytoskeleton anchorage to the cell surface at the site of the hemidesmosome. *Mol Biol Cell* **11**: 277-286
- Ishiko A, Shimizu H, Kikuchi A, Ebihara T, Hashimoto T, Nishikawa T (1993) Human autoantibodies against the 230-kD bullous pemphigoid antigen (BPAG1) bind only to the intracellular domain of the hemidesmosome, whereas those against the 180-kD bullous pemphigoid antigen (BPAG2) bind along the plasma membrane of the hemidesmosome in normal human and swine skin. *J Clin Invest* **91**: 1608-1615
- Jefferson JJ, Ciatto C, Shapiro L, Liem RK (2007) Structural analysis of the plakin domain of bullous pemphigoid antigen1

- (BPAG1) suggests that plakins are members of the spectrin superfamily. *J Mol Biol* **366**: 244-257
- Jeschke G, Chechik V, Ionita P, Godt A, Zimmermann H, Banham J, Timmel CR, Hilger D, Jung H (2006) DeerAnalysis2006—a comprehensive software package for analyzing pulsed ELDOR data. *Appl Magn Reson* **30**: 473-498
- Juanhuix J, Gil-Ortiz F, Cuni G, Colldelram C, Nicolas J, Lidon J, Boter E, Ruget C, Ferrer S, Benach J (2014) Developments in optics and performance at BL13-XALOC, the macromolecular crystallography beamline at the ALBA synchrotron. *J Synchrotron Radiat* **21**: 679-689
- Kabsch W (1976) A solution for the best rotation to relate two sets of vectors. *Acta Cryst A* **32**: 922-923
- Kabsch W (2010) Xds. *Acta Crystallogr D Biol Crystallogr* **66**: 125-132
- Kitajima Y, Aoyama Y, Seishima M (1999) Transmembrane signaling for adhesive regulation of desmosomes and hemidesmosomes, and for cell-cell attachment induced by pemphigus IgG in cultured keratinocytes: involvement of protein kinase C. *J Invest Dermatol Symp Proc* **4**: 137-144
- Koster J, Geerts D, Favre B, Borradori L, Sonnenberg A (2003) Analysis of the interactions between BP180, BP230, plectin and the integrin alpha6beta4 important for hemidesmosome assembly. *J Cell Sci* **116**: 387-399
- Koster J, van Wilpe S, Kuikman I, Litjens SH, Sonnenberg A (2004) Role of binding of plectin to the integrin beta4 subunit in the assembly of hemidesmosomes. *Mol Biol Cell* **15**: 1211-1223
- Leung CL, Zheng M, Prater SM, Liem RK (2001) The BPAG1 locus: Alternative splicing produces multiple isoforms with distinct cytoskeletal linker domains, including predominant isoforms in neurons and muscles. *J Cell Biol* **154**: 691-697
- Lyskov S, Chou FC, Conchuir SO, Der BS, Drew K, Kuroda D, Xu J, Weitzner BD, Renfrew PD, Sripakdeevong P, Borgo B, Havranek JJ, Kuhlman B, Kortemme T, Bonneau R, Gray JJ, Das R (2013) Serverification of molecular modeling applications: the Rosetta Online Server that Includes Everyone (ROSIE). *PLoS One* **8**: e63906
- Manso JA, Garcia Rubio I, Gomez-Hernandez M, Ortega E, Buey RM, Carballido AM, Carabias A, Alonso-Garcia N, de Pereda JM (2016) Purification and Structural Analysis of Plectin and BPAG1e. *Methods Enzymol* **569**: 177-196
- Margadant C, Frijns E, Wilhelmsen K, Sonnenberg A (2008) Regulation of hemidesmosome disassembly by growth factor receptors. *Curr Opin Cell Biol* **20**: 589-596
- McCoy AJ, Grosse-Kunstleve RW, Adams PD, Winn MD, Storoni LC, Read RJ (2007) Phaser crystallographic software. *J Appl Cryst* **40**: 658-674
- Niessen CM, Hulsman EH, Oomen LC, Kuikman I, Sonnenberg A (1997a) A minimal region on the integrin beta4 subunit that is critical to its localization in hemidesmosomes regulates the distribution of HD1/plectin in COS-7 cells. *J Cell Sci* **110**: 1705-1716.
- Niessen CM, Hulsman EH, Rots ES, Sanchez-Aparicio P, Sonnenberg A (1997b) Integrin alpha 6 beta 4 forms a complex with the cytoskeletal protein HD1 and induces its redistribution in transfected COS-7 cells. *Mol Biol Cell* **8**: 555-566.
- Nishizawa Y, Uematsu J, Owaribe K (1993) HD4, a 180 kDa bullous pemphigoid antigen, is a major transmembrane glycoprotein of the hemidesmosome. *J Biochem* **113**: 493-501
- Pannier M, Veit S, Godt A, Jeschke G, Spiess HW (2000) Dead-time free measurement of dipole-dipole interactions between electron spins. *J Magn Reson* **142**: 331-340
- Petoukhov MV, Konarev PV, Kikhney AG, Svergun DI (2007) ATSAS 2.1 - towards automated and web-supported small-angle scattering data analysis. *J Appl Cryst* **40**: s223-s228
- Rabinovitz I, Toker A, Mercurio AM (1999) Protein kinase C-dependent mobilization of the alpha6beta4 integrin from hemidesmosomes and its association with actin-rich cell protrusions drive the chemotactic migration of carcinoma cells. *J Cell Biol* **146**: 1147-1160.
- Rabinovitz I, Tsomo L, Mercurio AM (2004) Protein kinase C-alpha phosphorylation of specific serines in the connecting segment of the beta 4 integrin regulates the dynamics of type II hemidesmosomes. *Mol Cell Biol* **24**: 4351-4360
- Rezniczek GA, de Pereda JM, Reipert S, Wiche G (1998) Linking integrin alpha6beta4-based cell adhesion to the intermediate filament cytoskeleton: direct interaction between the beta4 subunit and plectin at multiple molecular sites. *J Cell Biol* **141**: 209-225.
- Schaapveld RQ, Borradori L, Geerts D, van Leusden MR, Kuikman I, Nievers MG, Niessen CM, Steenbergen RD, Snijders PJ, Sonnenberg A (1998) Hemidesmosome formation is initiated by the beta4 integrin subunit, requires complex formation of beta4 and HD1/plectin, and involves a direct interaction between beta4 and the bullous pemphigoid antigen 180. *J Cell Biol* **142**: 271-284.
- Schrödinger L. (2015) The PyMOL Molecular Graphics System, Version 1.8.
- Smith CA, Kortemme T (2011) Predicting the tolerated sequences for proteins and protein interfaces using RosettaBackrub flexible backbone design. *PLoS One* **6**: e20451
- Song JG, Kostan J, Drepper F, Knapp B, de Almeida Ribeiro E, Jr., Konarev PV, Grishkovskaya I, Wiche G, Gregor M, Svergun DI, Warscheid B, Djinic-Carugo K (2015) Structural Insights into Ca(2+)-Calmodulin Regulation of Plectin 1a-Integrin beta4 Interaction in Hemidesmosomes. *Structure* **23**: 558-570
- Sonnenberg A, Rojas AM, de Pereda JM (2007) The structure of a tandem pair of spectrin repeats of plectin reveals a modular organization of the plakin domain. *J Mol Biol* **368**: 1379-1391

Stegh AH, Herrmann H, Lampel S, Weisenberger D, Andra K, Seper M, Wiche G, Krammer PH, Peter ME (2000) Identification of the cytolinker plectin as a major early in vivo substrate for caspase 8 during CD95- and tumor necrosis factor receptor-mediated apoptosis. *Mol Cell Biol* **20**: 5665-5679

Sterk LM, Geuijen CA, Oomen LC, Calafat J, Janssen H, Sonnenberg A (2000) The tetraspan molecule CD151, a novel constituent of hemidesmosomes, associates with the integrin alpha6beta4 and may regulate the spatial organization of hemidesmosomes. *J Cell Biol* **149**: 969-982

Svergun D (1992) Determination of the regularization parameter in indirect-transform methods using perceptual criteria. *J Appl Cryst* **25**: 495-503

Tang HY, Chaffotte AF, Thacher SM (1996) Structural analysis of the predicted coiled-coil rod domain of the cytoplasmic bullous pemphigoid antigen (BPAG1). Empirical localization of the N-terminal globular domain-rod boundary. *J Biol Chem* **271**: 9716-9722

Tria G, Mertens HDT, Kachala M, Svergun DI (2015) Advanced ensemble modelling of flexible macromolecules using X-ray solution scattering. *IUCrJ* **2**: 207-217

Tschaggelar R, Kasumaj B, Santangelo MG, Forrer J, Leger P, Dube H, Diederich F, Harmer J, Schuhmann R, Garcia-Rubio I, Jeschke G (2009) Cryogenic 35GHz pulse ENDOR probehead accommodating large sample sizes: Performance and applications. *J Magn Reson* **200**: 81-87

Uematsu J, Nishizawa Y, Sonnenberg A, Owaribe K (1994) Demonstration of type II hemidesmosomes in a mammary gland epithelial cell line, BMGE-H. *J Biochem* **115**: 469-476

Van den Bergh F, Eliason SL, Giudice GJ (2011) Type XVII collagen (BP180) can function as a cell-matrix adhesion molecule via binding to laminin 332. *Matrix Biol* **30**: 100-108

Walko G, Castanon MJ, Wiche G (2015) Molecular architecture and function of the hemidesmosome. *Cell Tissue Res* **360**: 529-544

Wilhelmsen K, Litjens SH, Kuikman I, Margadant C, van Rheenen J, Sonnenberg A (2007) Serine phosphorylation of the integrin beta4 subunit is necessary for epidermal growth factor receptor induced hemidesmosome disruption. *Mol Biol Cell* **18**: 3512-3522

Wilhelmsen K, Litjens SH, Sonnenberg A (2006) Multiple functions of the integrin alpha6beta4 in epidermal homeostasis and tumorigenesis. *Mol Cell Biol* **26**: 2877-2886

**Table 1. Crystallographic data collection and refinement statistics**

| Complex                                | $\beta 4$ (T1663R)-BP230                                    | $\beta 4$ (WT)-BP230                                        |
|----------------------------------------|-------------------------------------------------------------|-------------------------------------------------------------|
| <b>Data Collection</b>                 |                                                             |                                                             |
| X-ray beamline                         | Xaloc (Alba)                                                | i03 (Diamond)                                               |
| Space group                            | C2                                                          | C2                                                          |
| Cell dimensions                        | a = 105.6 Å<br>b = 59.5 Å<br>c = 42.4 Å<br>$\beta$ = 113.5° | a = 104.5 Å<br>b = 60.7 Å<br>c = 40.8 Å<br>$\beta$ = 113.7° |
| Wavelength (Å)                         | 0.97915                                                     | 0.97625                                                     |
| Resolution (Å)                         | 1.55 (1.59-1.55) <sup>a</sup>                               | 2.05 (2.10-2.05) <sup>a</sup>                               |
| Unique reflections                     | 35010 (2562) <sup>a</sup>                                   | 14766 (1091) <sup>a</sup>                                   |
| Average multiplicity                   | 19.9 (19.4) <sup>a</sup>                                    | 6.7 (6.9) <sup>a</sup>                                      |
| Completeness (%)                       | 99.7 (99.8) <sup>a</sup>                                    | 99.5 (100) <sup>a</sup>                                     |
| R <sub>meas</sub> <sup>b</sup> (%)     | 5.6 (350) <sup>a</sup>                                      | 10.5 (195) <sup>a</sup>                                     |
| CC 1/2 (%)                             | 100 (70.5) <sup>a</sup>                                     | 99.8 (69.4) <sup>a</sup>                                    |
| Mean $I/\sigma I$                      | 26.4 (1.53) <sup>a</sup>                                    | 11.7 (1.28) <sup>a</sup>                                    |
| <b>Refinement</b>                      |                                                             |                                                             |
| Resolution range (Å)                   | 39 – 1.55                                                   | 48 – 2.05                                                   |
| Unique reflections, work/free          | 33244 / 1749                                                | 14019 / 703                                                 |
| R work (%)                             | 19.5                                                        | 22.4                                                        |
| R free <sup>c</sup> (%)                | 21.0                                                        | 23.6                                                        |
| Number of                              |                                                             |                                                             |
| residues ( $\beta 4$ / BP230)          | 202 / 24                                                    | 199 / 23                                                    |
| waters                                 | 105                                                         | 46                                                          |
| Glycerol                               | 2                                                           | -                                                           |
| Average B value (Å <sup>2</sup> )      |                                                             |                                                             |
| Wilson plot                            | 31.6                                                        | 45.8                                                        |
| Protein ( $\beta 4$ / BP230)           | 44.4 / 42.5                                                 | 64.3 / 63.2                                                 |
| Solvent                                | 41.7                                                        | 48.7                                                        |
| Glycerol                               | 51.3                                                        | -                                                           |
| rmsd bond lengths (Å)                  | 0.004                                                       | 0.002                                                       |
| rmsd angles (°)                        | 0.721                                                       | 0.496                                                       |
| Ramachandran distribution <sup>d</sup> |                                                             |                                                             |
| Favored regions                        | 212 (97.7%)                                                 | 213 (98.2%)                                                 |
| Additionally allowed                   | 5 (2.3%)                                                    | 4 (1.8%)                                                    |
| Outliers                               | 0                                                           | 0                                                           |
| PDB code                               | 6GVK                                                        | 6GVL                                                        |

<sup>a</sup> Numbers in parenthesis correspond to the outer resolution shell.

<sup>b</sup> R<sub>meas</sub> is the multiplicity independent R factor as described (Diederichs & Karplus, 1997).

<sup>c</sup> Calculated using 5% of reflections that were not included in the refinement.

<sup>d</sup> Analyzed with the program MOLPROBITY (Davis et al, 2007).
